# Supplementary material for: Monoterpenoid Glycosides from the Leaves of Ligustrum robustum and Their Bioactivities
Source: MDPI journal article supplement (doi:10.3390/molecules27123709), 2022-06-09
Supplement: s1 [file s1]

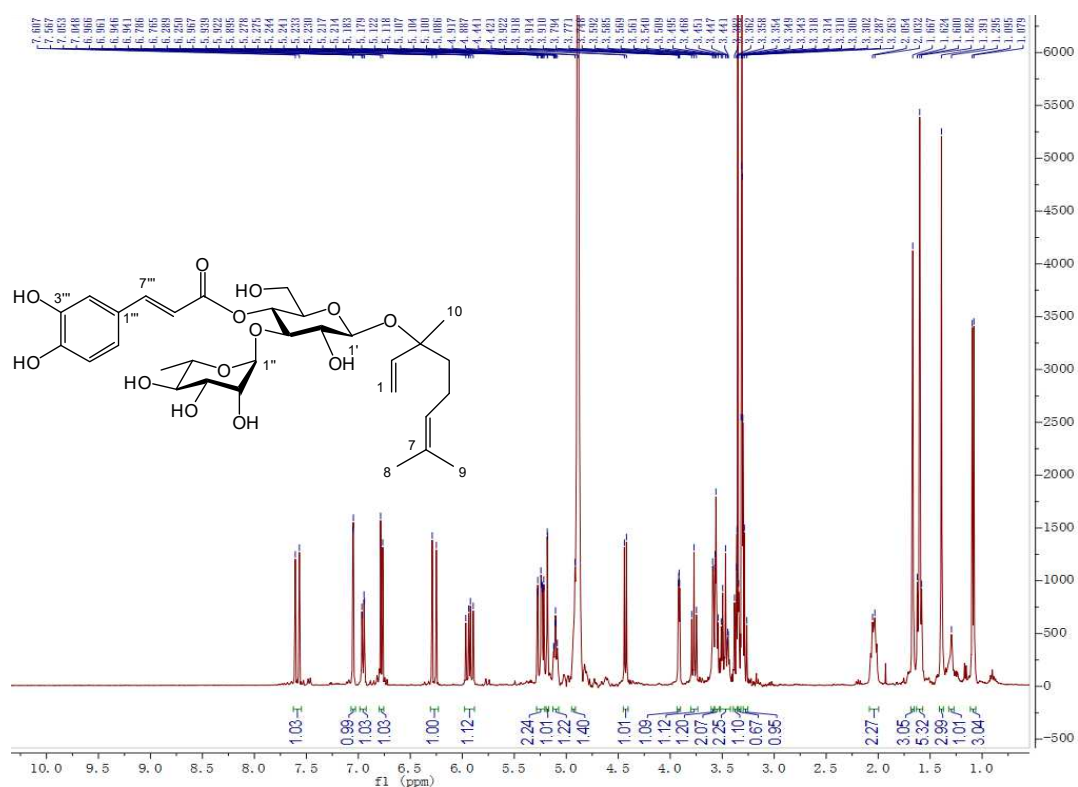

Figure S1-1 <sup>1</sup>H NMR spectrum of compound 1 in CD<sub>3</sub>OD (400 MHz)

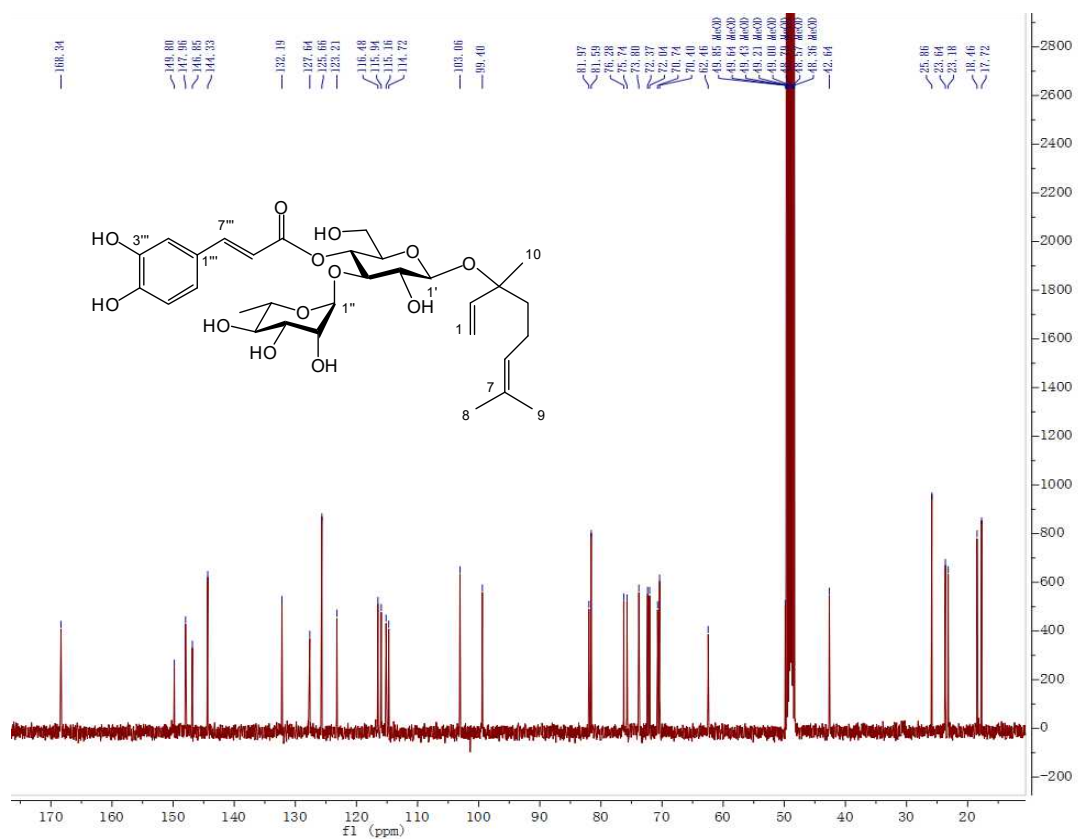

Figure S1-2 <sup>13</sup>C NMR spectrum of compound 1 in CD<sub>3</sub>OD (400 MHz)

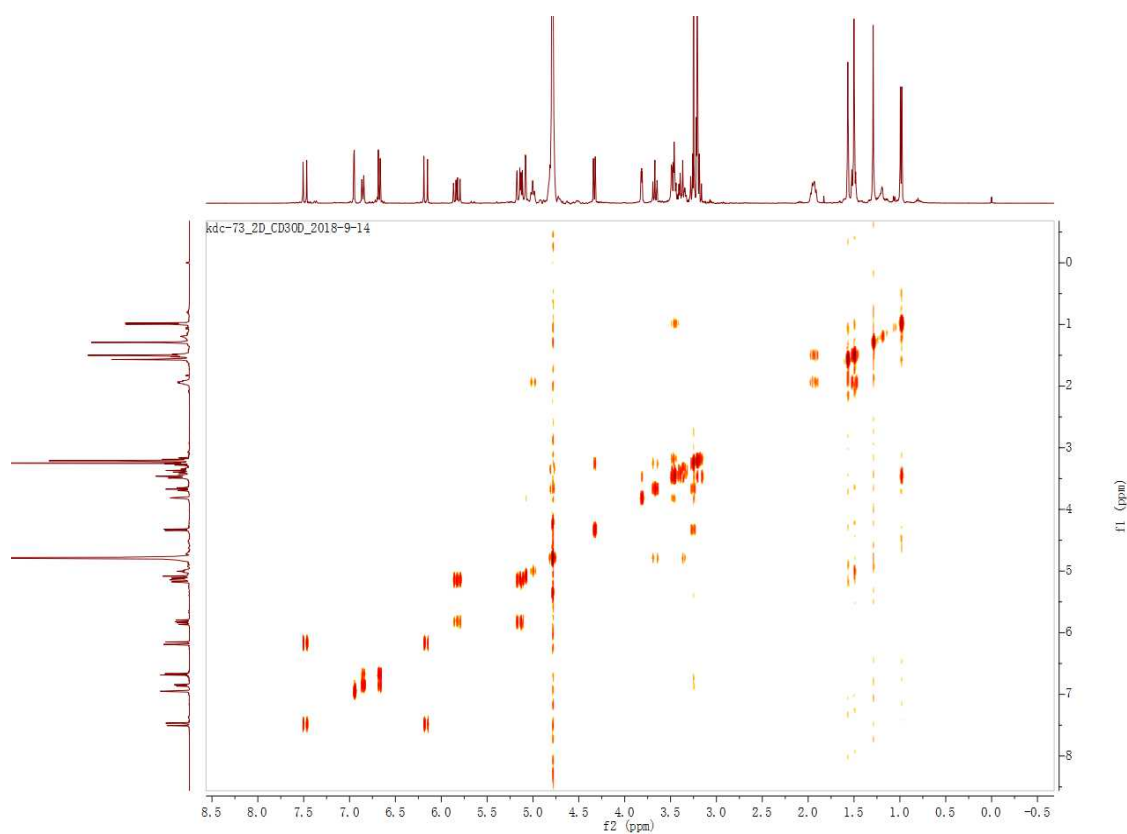

Figure S1-3  $^1\text{H}$ - $^1\text{H}$  COSY spectrum of compound **1** in  $\text{CD}_3\text{OD}$  (400 MHz)

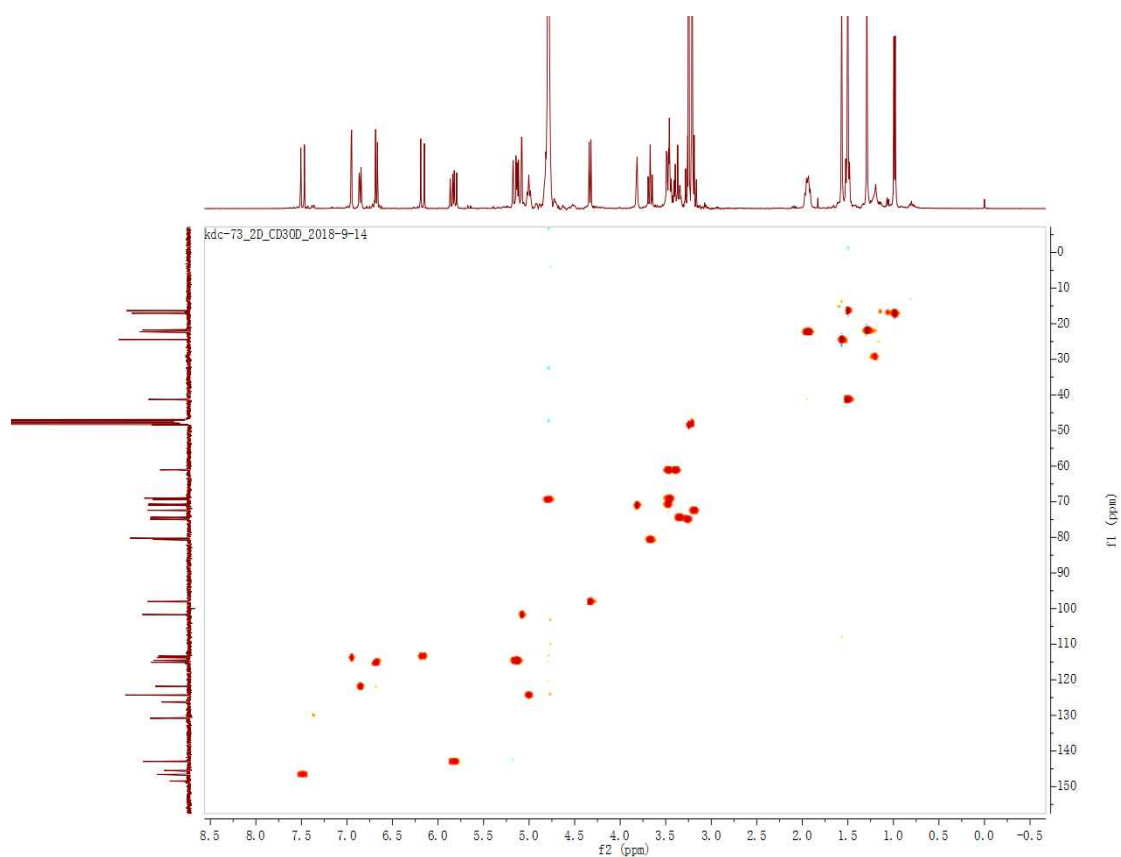

Figure S1-4 HSQC spectrum of compound **1** in  $\text{CD}_3\text{OD}$  (400 MHz)

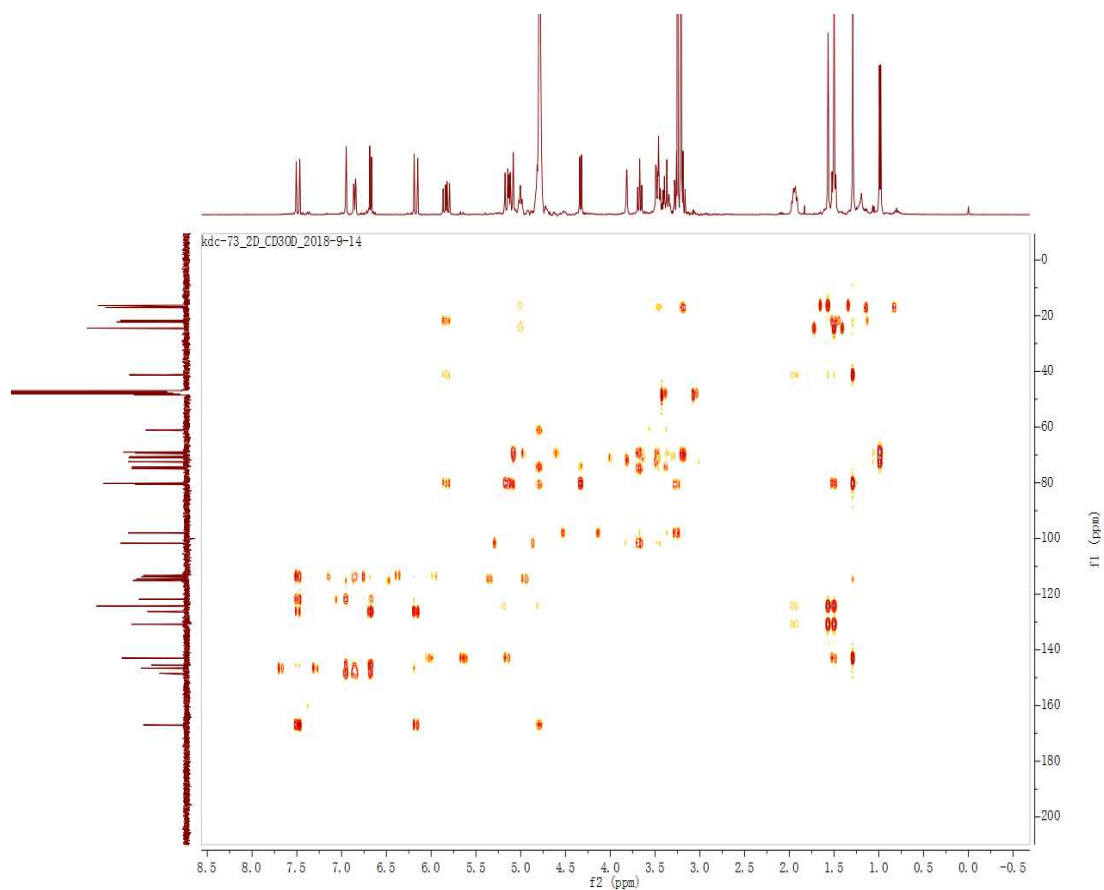

Figure S1-5 HMBC spectrum of compound **1** in CD<sub>3</sub>OD (400 MHz)

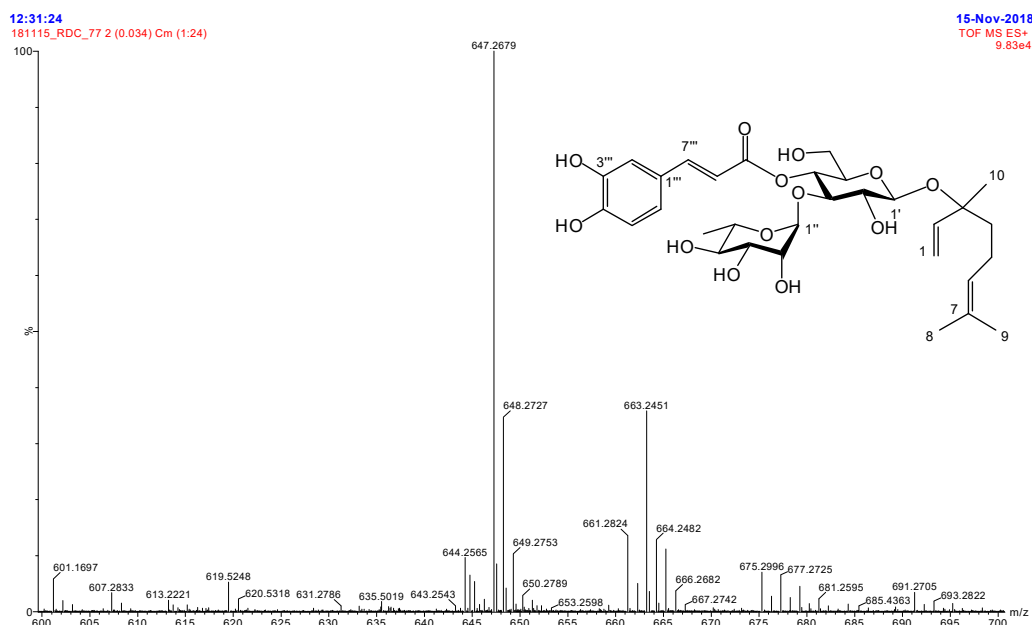

Figure S1-6 HRESIMS spectrum of compound **1**

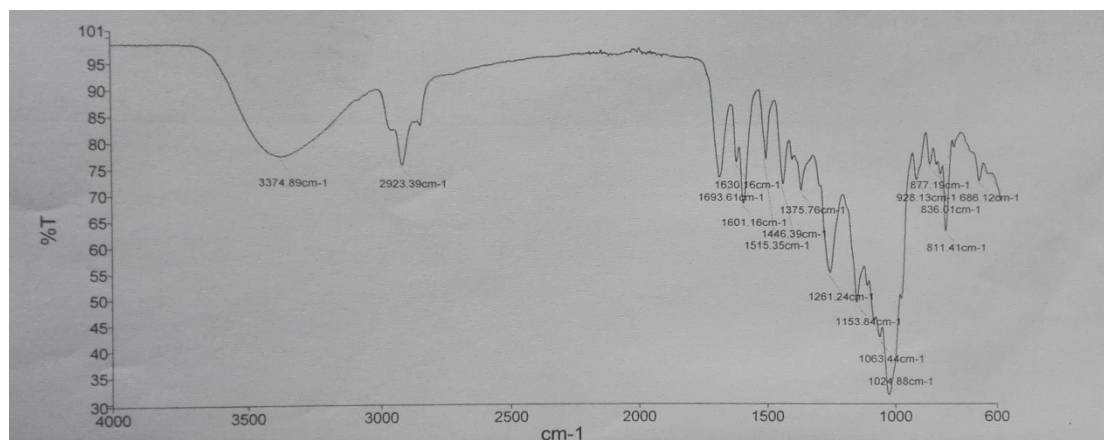

Figure S1-7 IR spectrum of compound **1** (film)

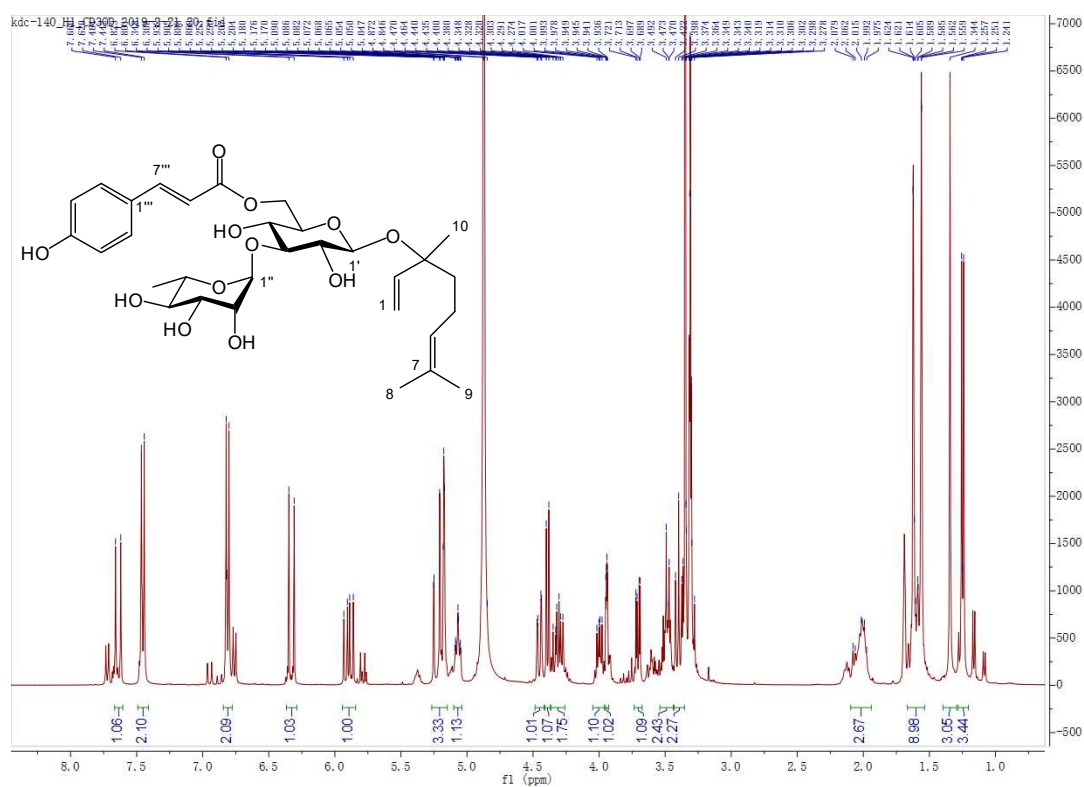

Figure S2-1 <sup>1</sup>H NMR spectrum of compound **2** in CD<sub>3</sub>OD (400 MHz)

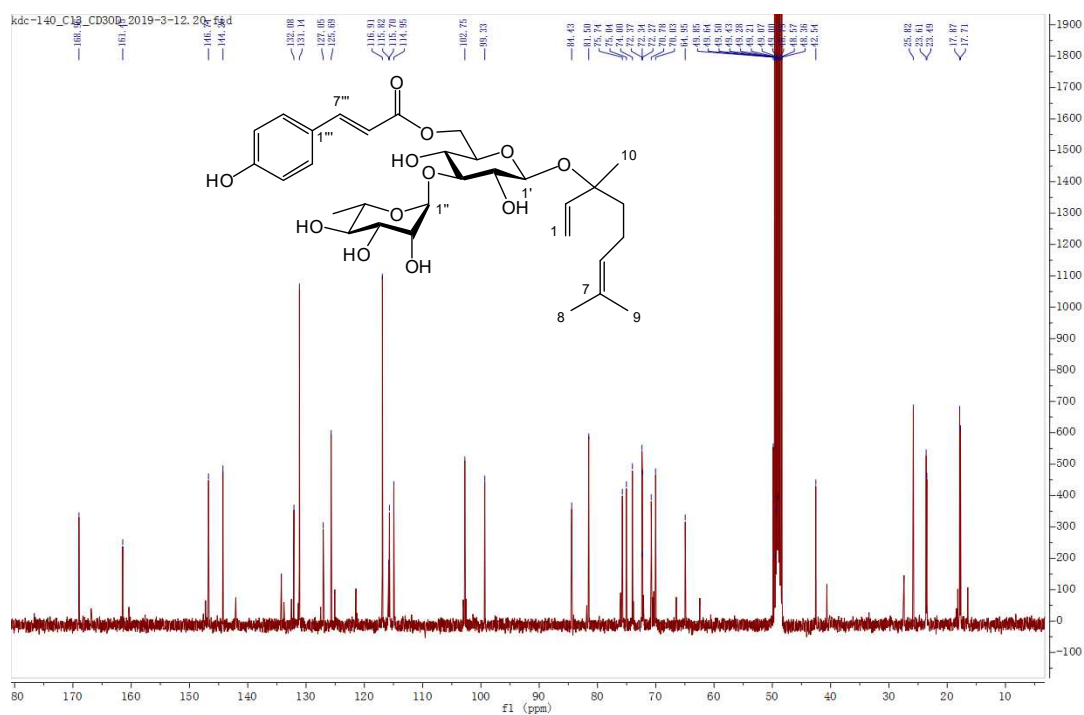

Figure S2-2  $^{13}\text{C}$  NMR spectrum of compound **2** in  $\text{CD}_3\text{OD}$  (100 MHz)

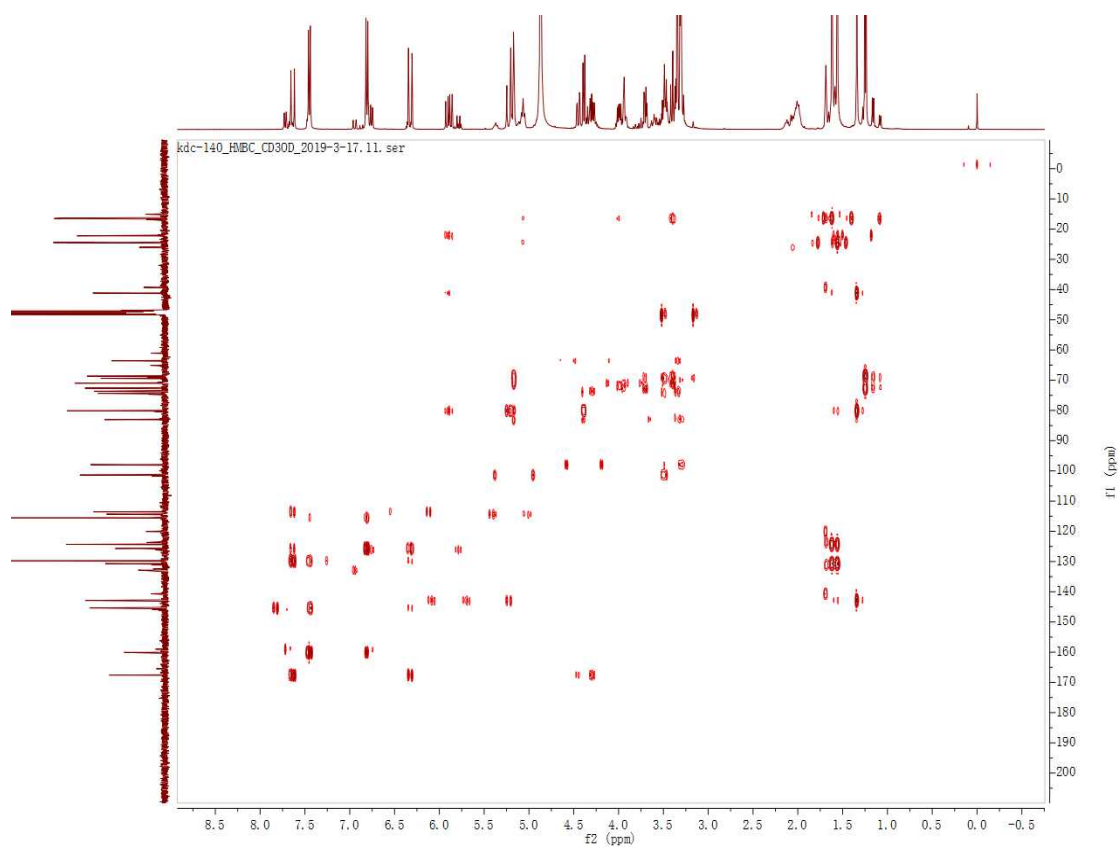

Figure S2-3 HMBC spectrum of compound **2** in  $\text{CD}_3\text{OD}$  (400 MHz)

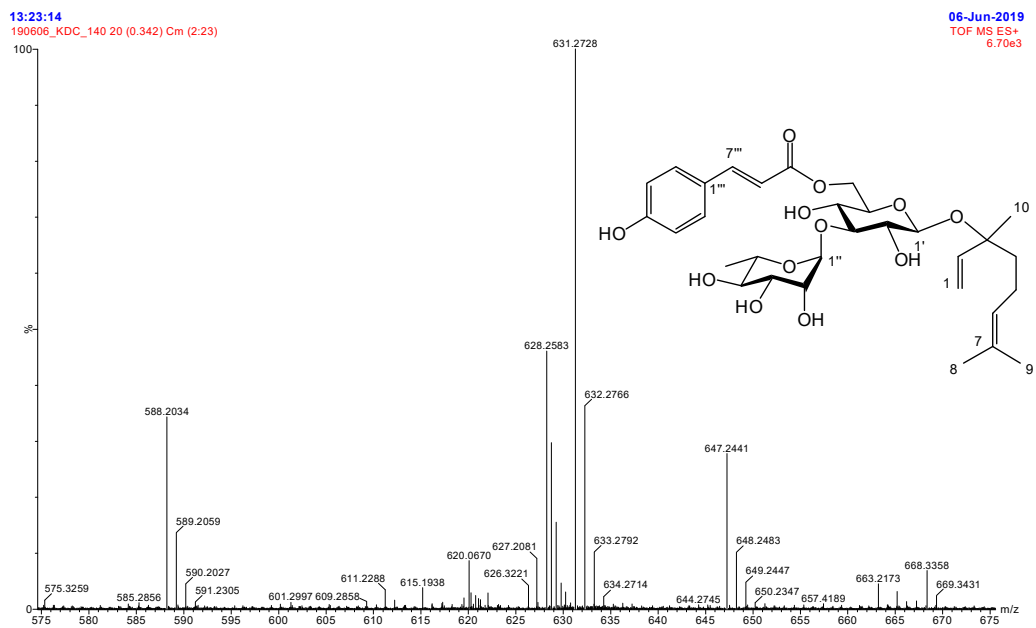

Figure S2-4 HRESIMS spectrum of compound 2

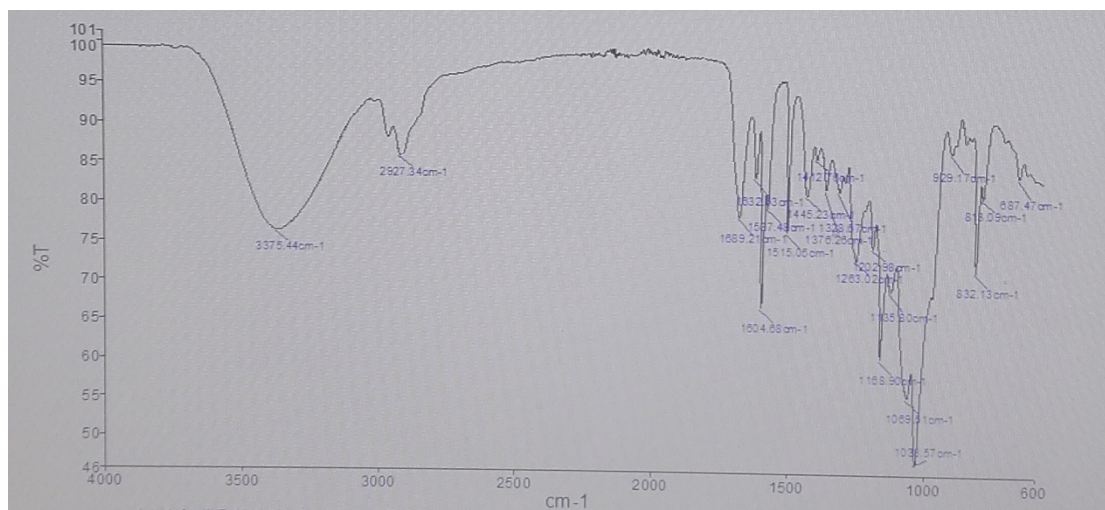

Figure S2-5 IR spectrum of compound 2 (film)

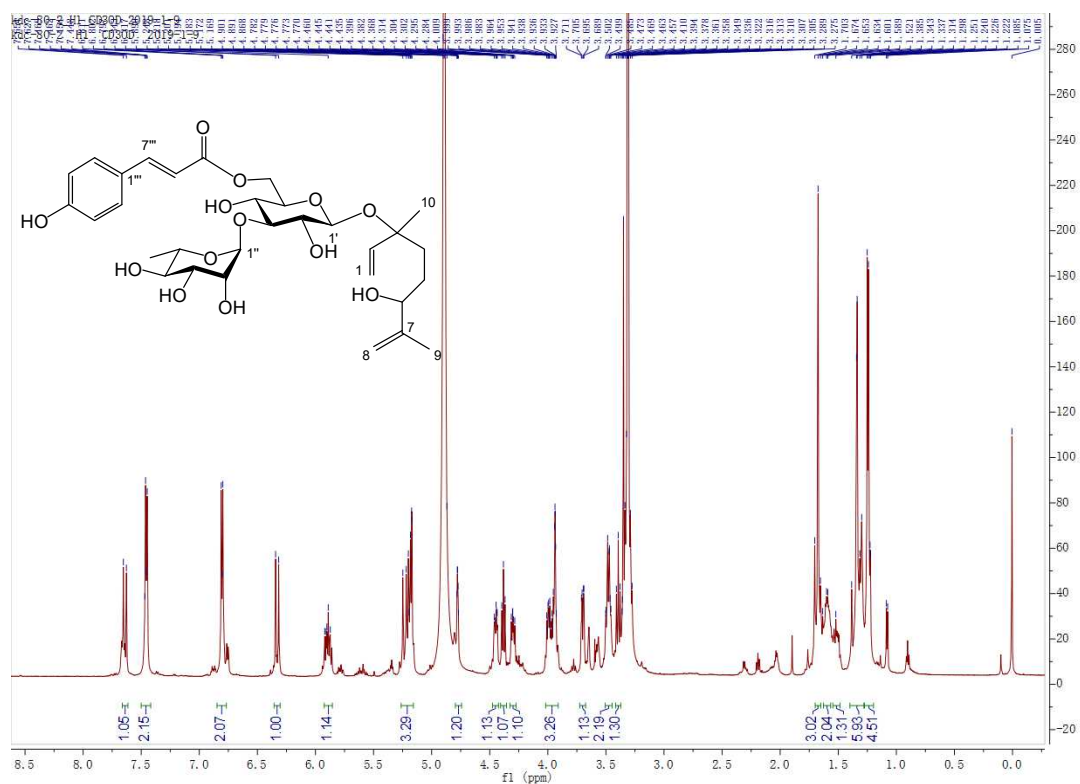

Figure S3-1 <sup>1</sup>H NMR spectrum of compound **3** in CD<sub>3</sub>OD (600 MHz)

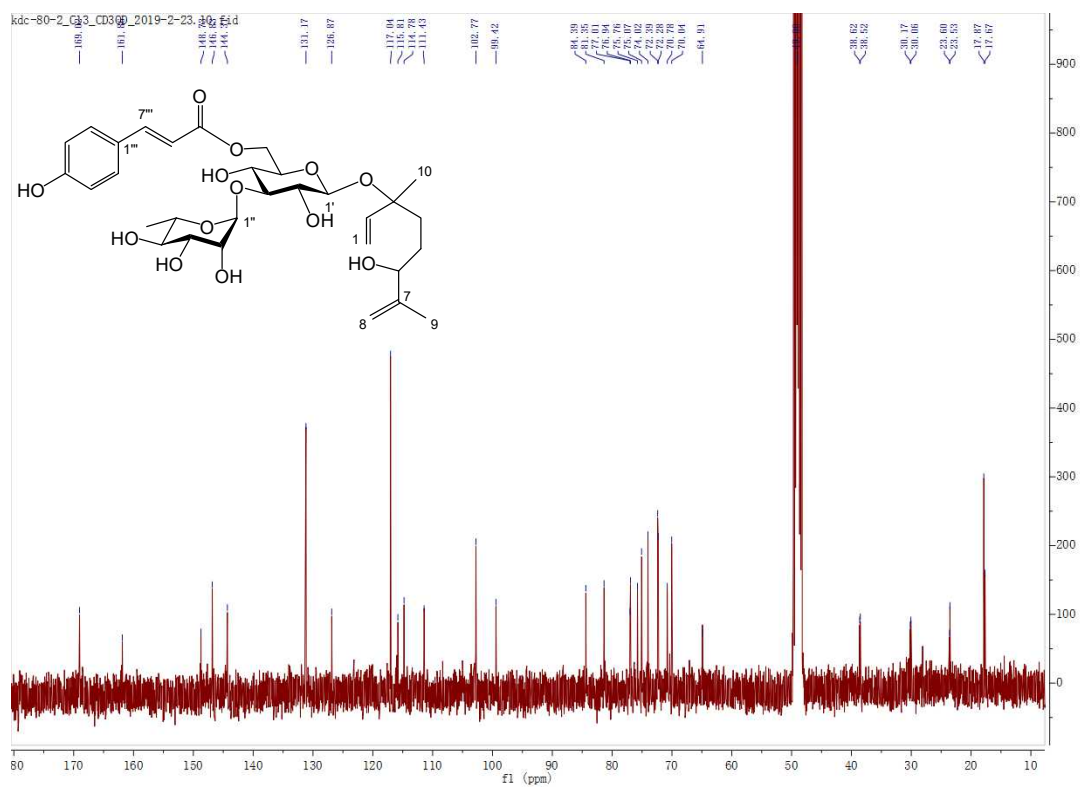

Figure S3-2 <sup>13</sup>C NMR spectrum of compound **3** in CD<sub>3</sub>OD (100 MHz)

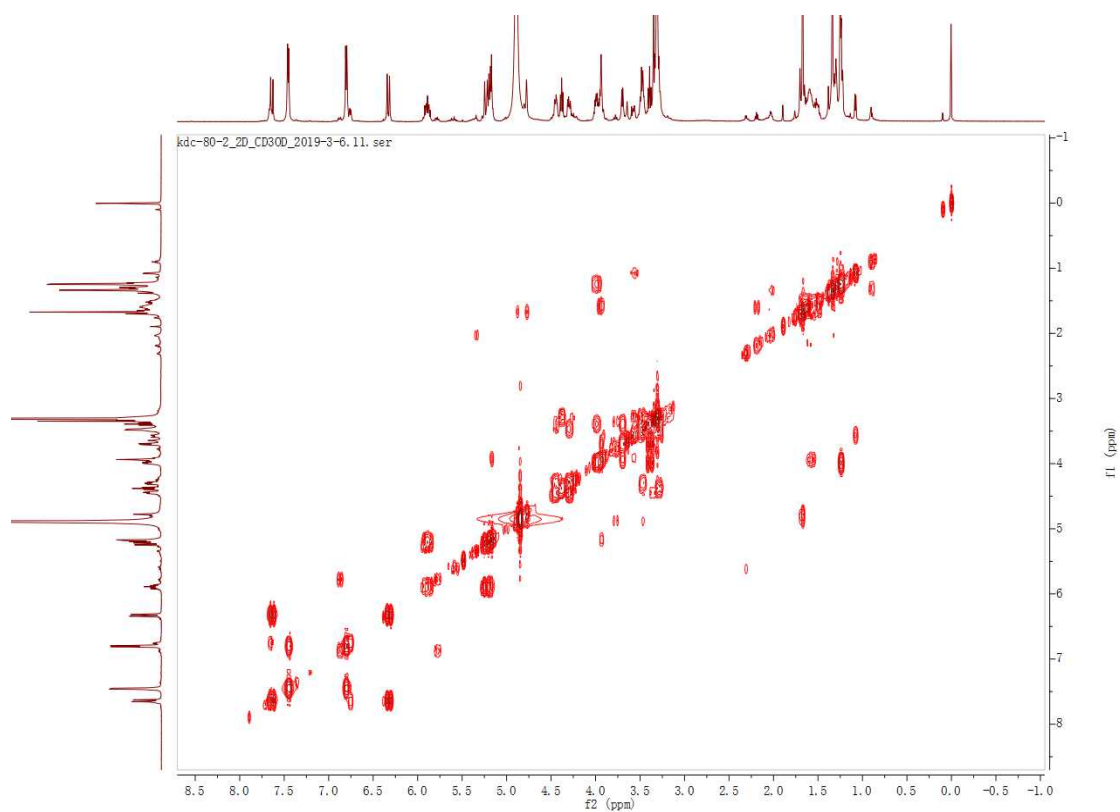

Figure S3-3  $^1\text{H}$ - $^1\text{H}$  NMR spectrum of compound **3** in  $\text{CD}_3\text{OD}$  (400 MHz)

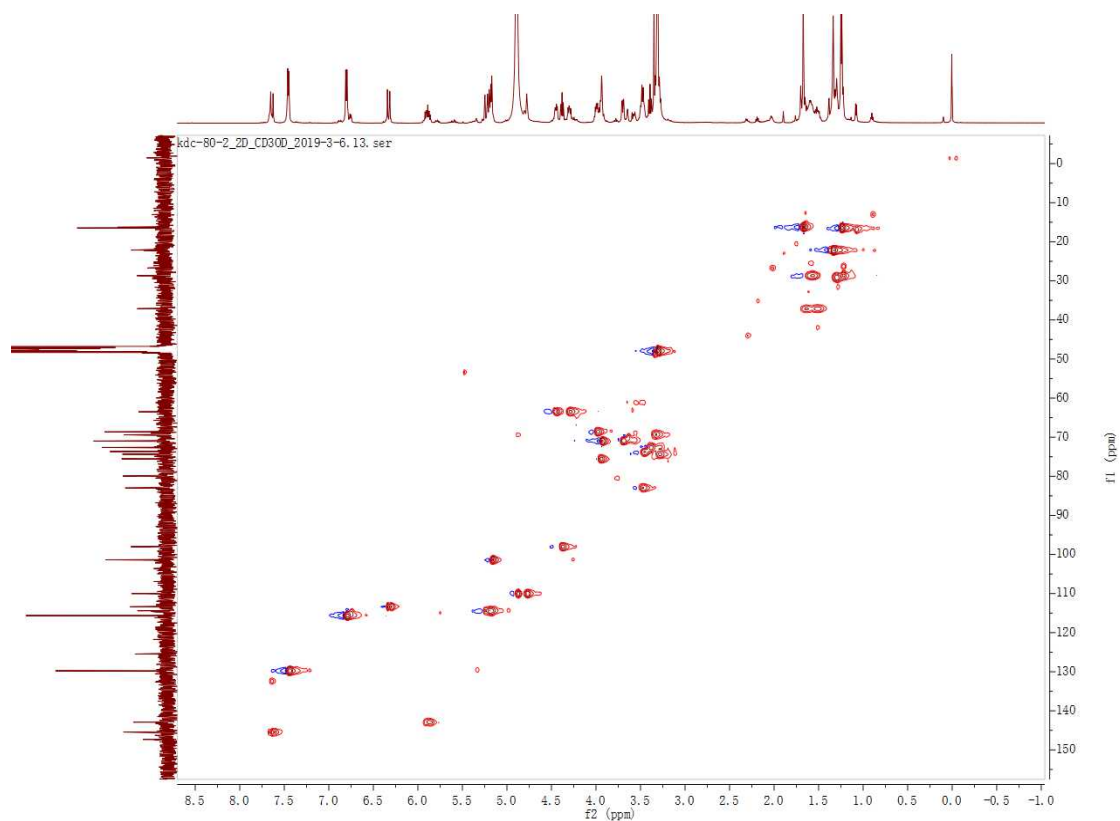

Figure S3-4 HSQC spectrum of compound **3** in  $\text{CD}_3\text{OD}$  (400 MHz)

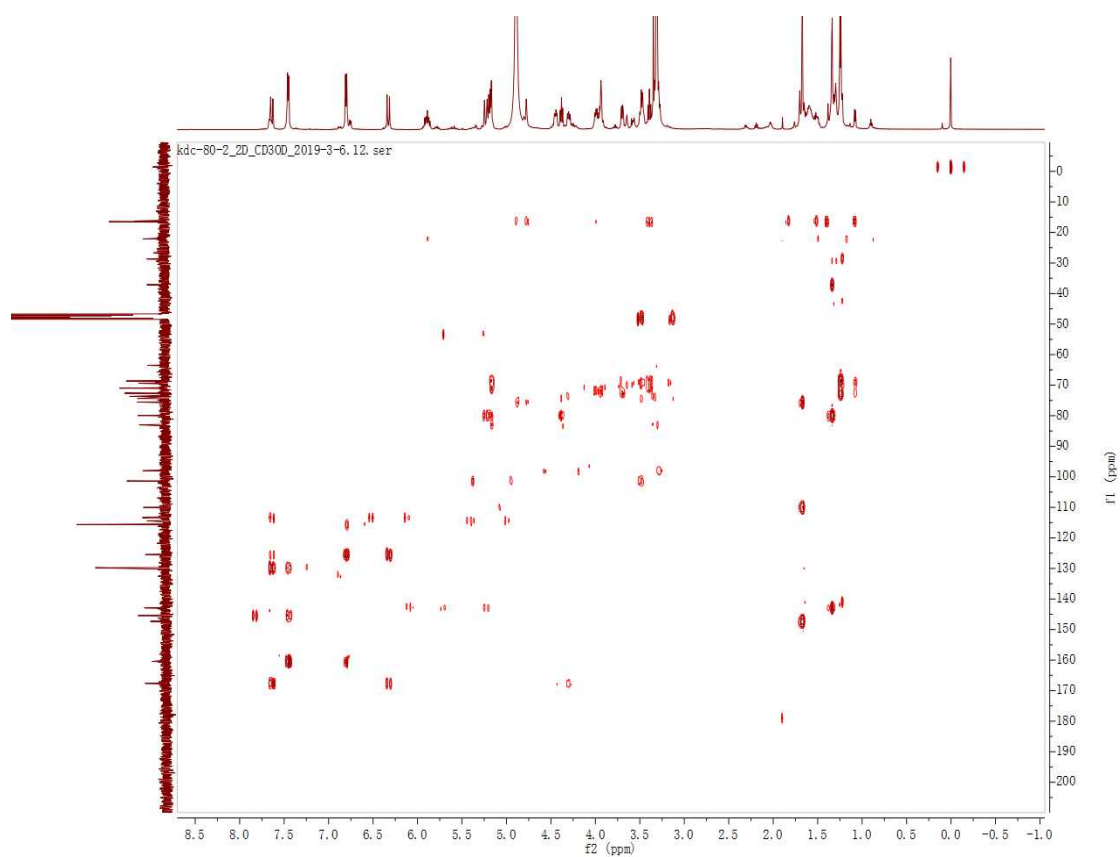

Figure S3-5 HMBC spectrum of compound **3** in CD<sub>3</sub>OD (400 MHz)

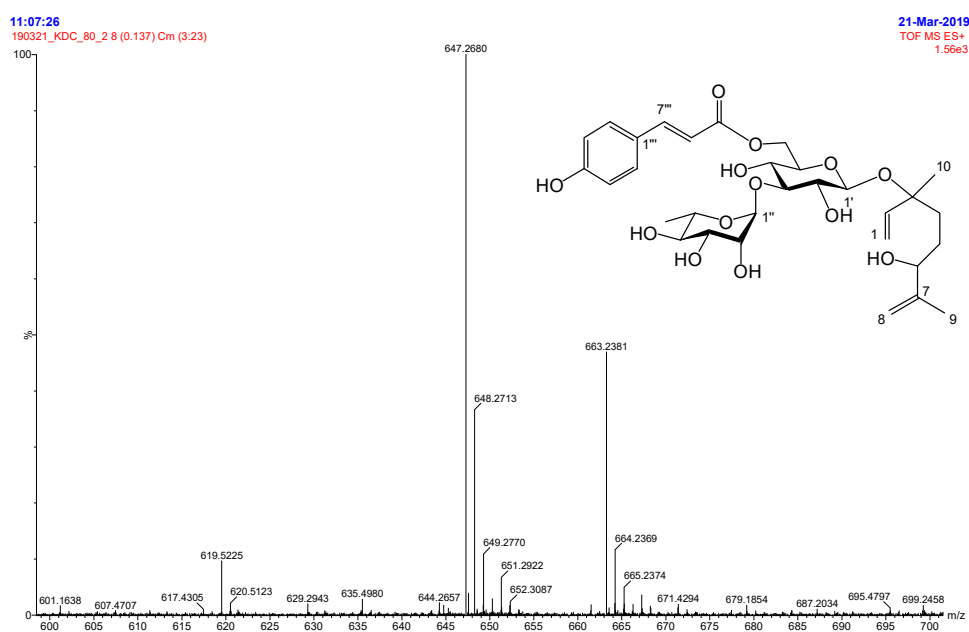

Figure S3-6 HRESIMS spectrum of compound **3**

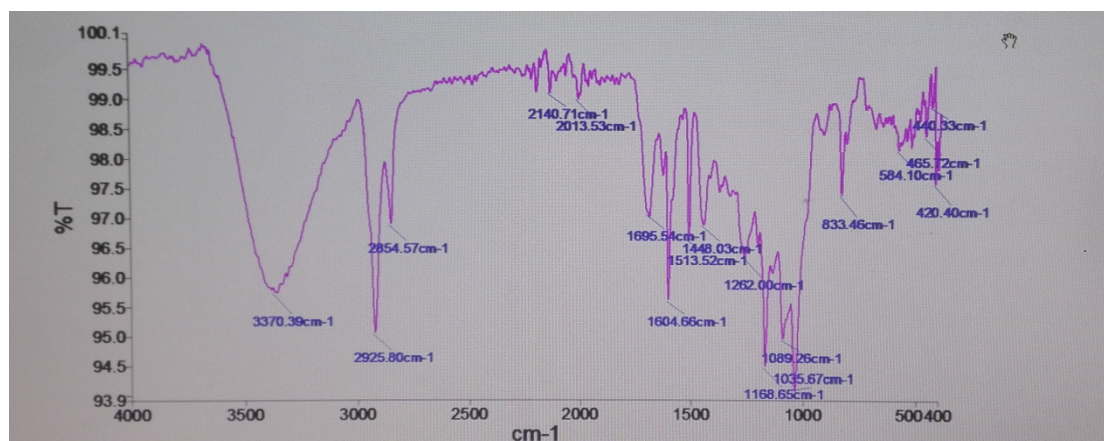

Figure S3-7 IR spectrum of compound 3 (film)

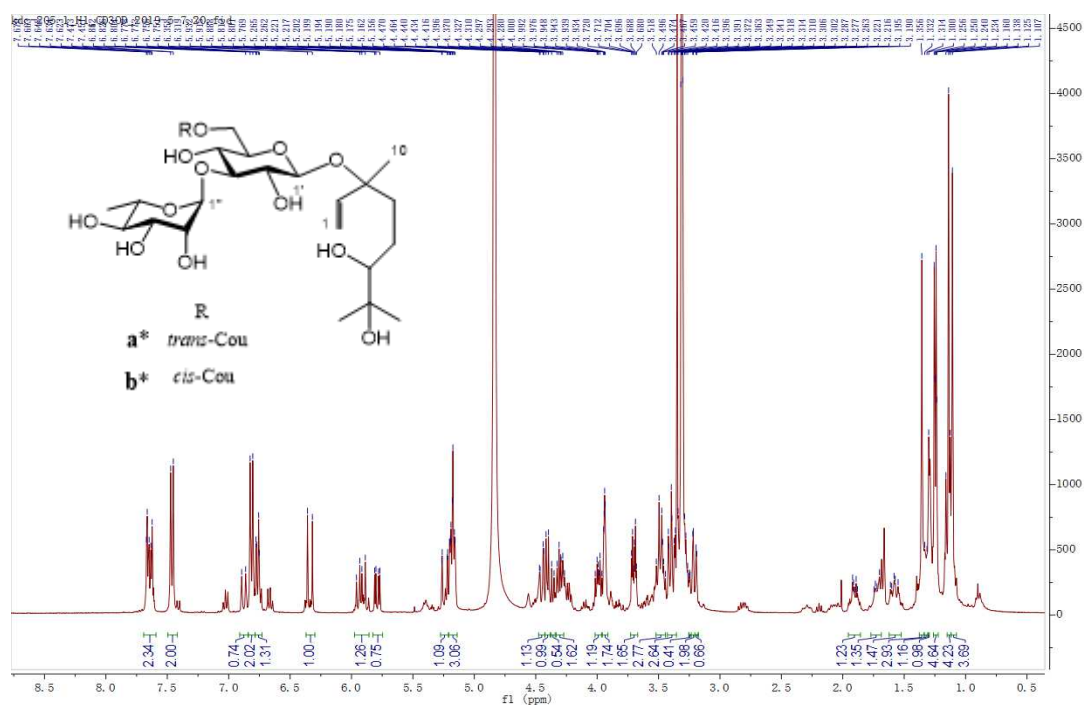

Figure S4-1  $^1\text{H}$  NMR spectrum of mixture 4 in  $\text{CD}_3\text{OD}$  (400 MHz)

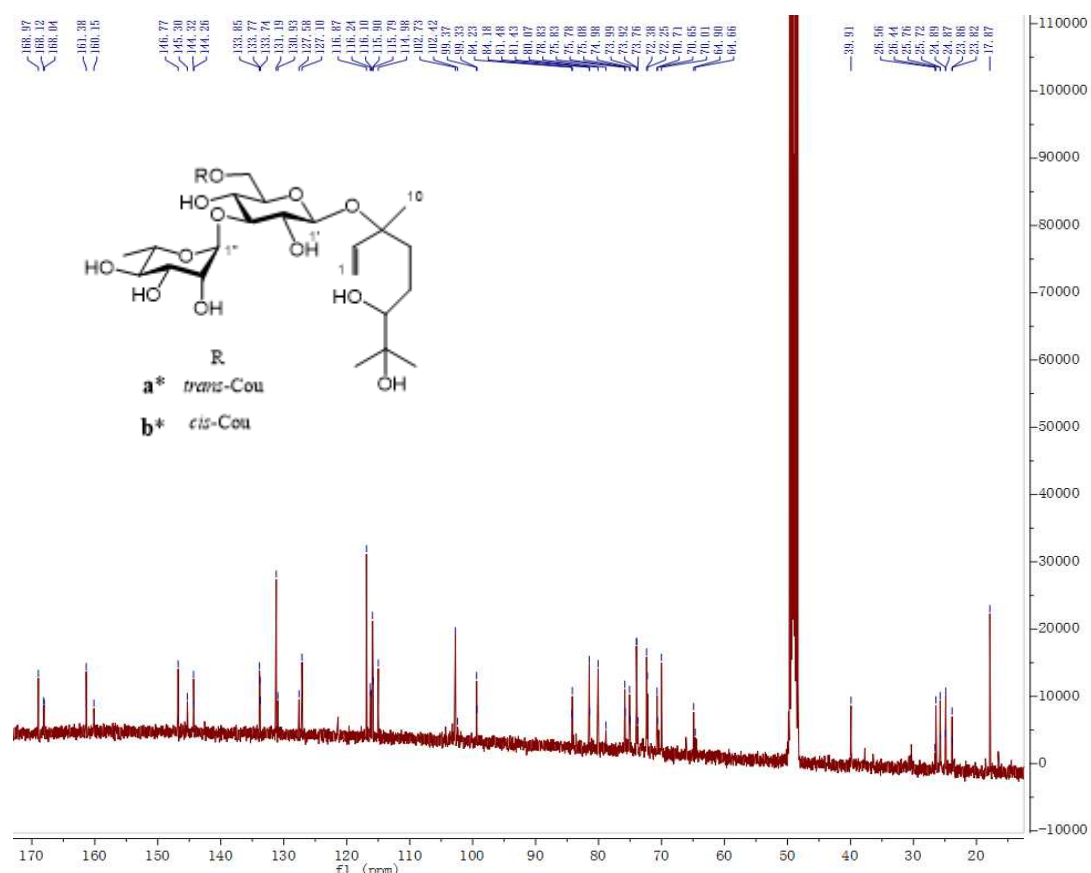

Figure S4-2  $^{13}\text{C}$  NMR spectrum of mixture 4 in  $\text{CD}_3\text{OD}$  (100 MHz)

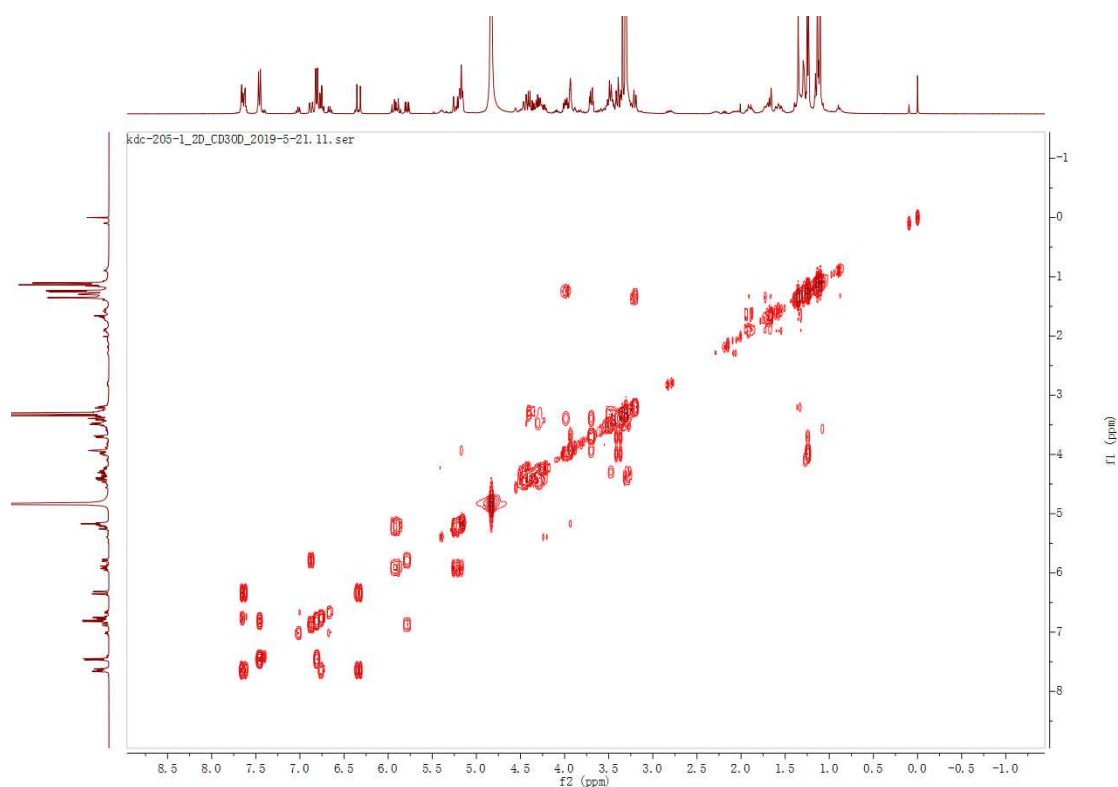

Figure S4-3  $^1\text{H}$ - $^1\text{H}$  COSY spectrum of mixture 4 in  $\text{CD}_3\text{OD}$  (400 MHz)

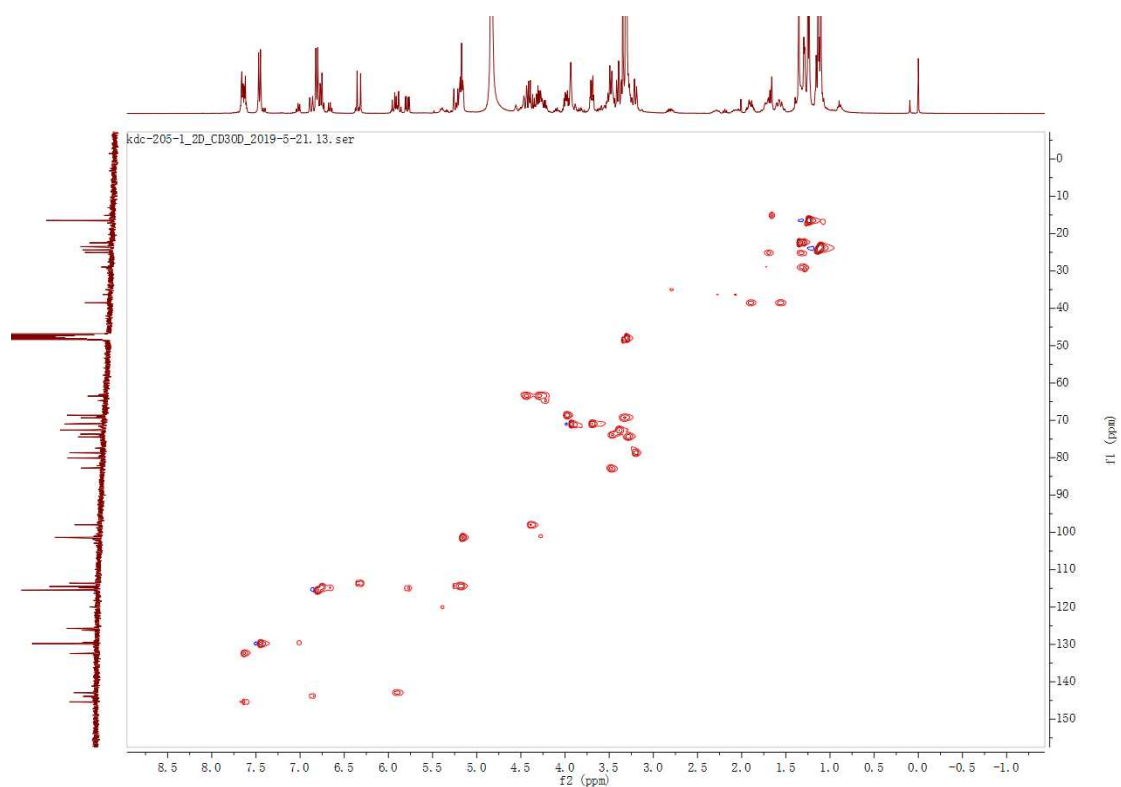

Figure S4-4 HSQC spectrum of mixture **4** in CD<sub>3</sub>OD (400 MHz)

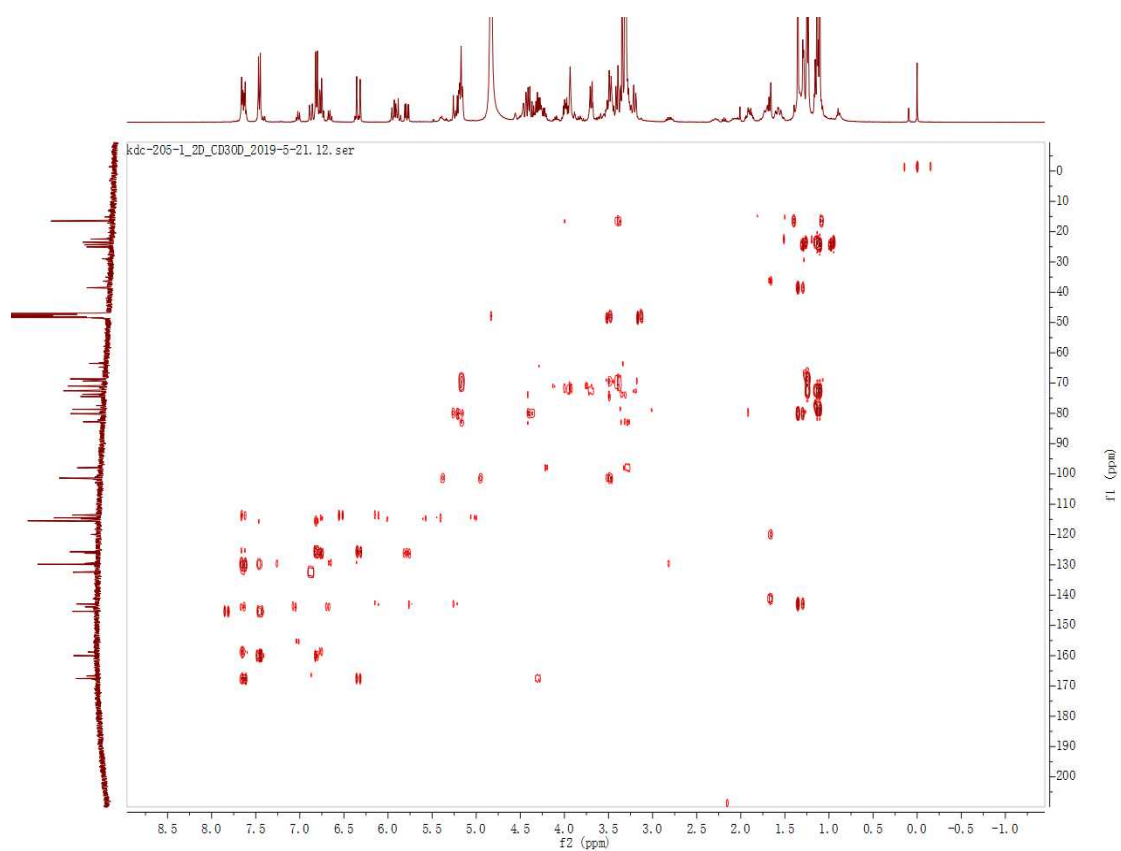

Figure S4-5 HMBC spectrum of mixture **4** in CD<sub>3</sub>OD (400 MHz)

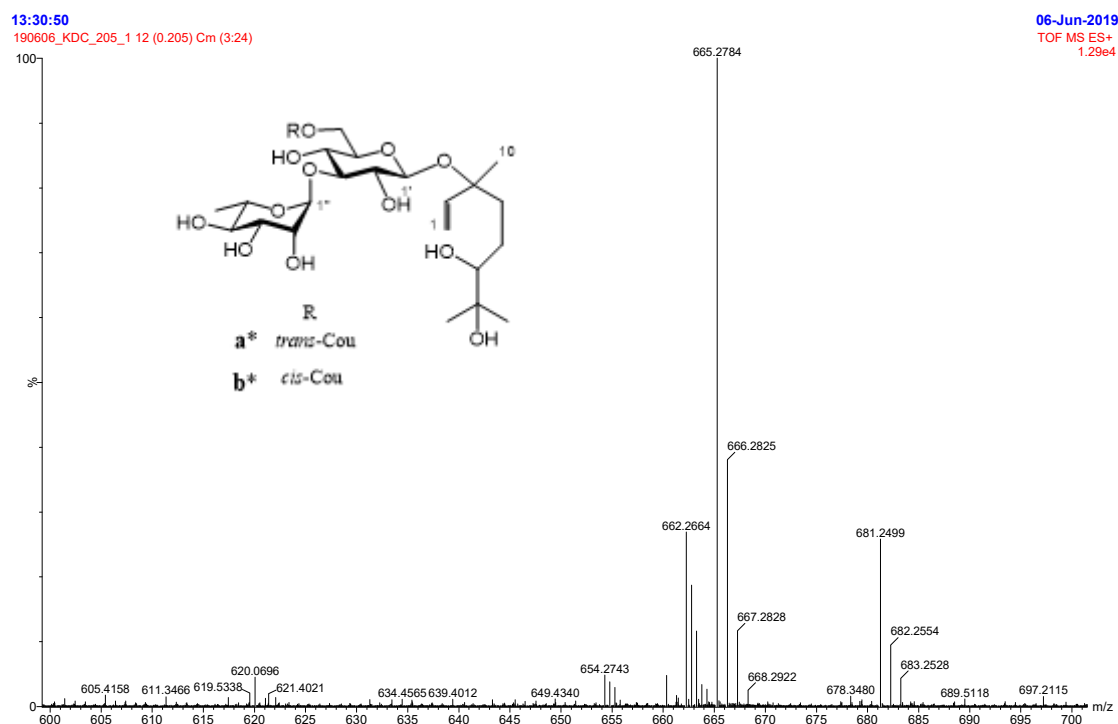

Figure S4-6 HRESIMS spectrum of mixture 4

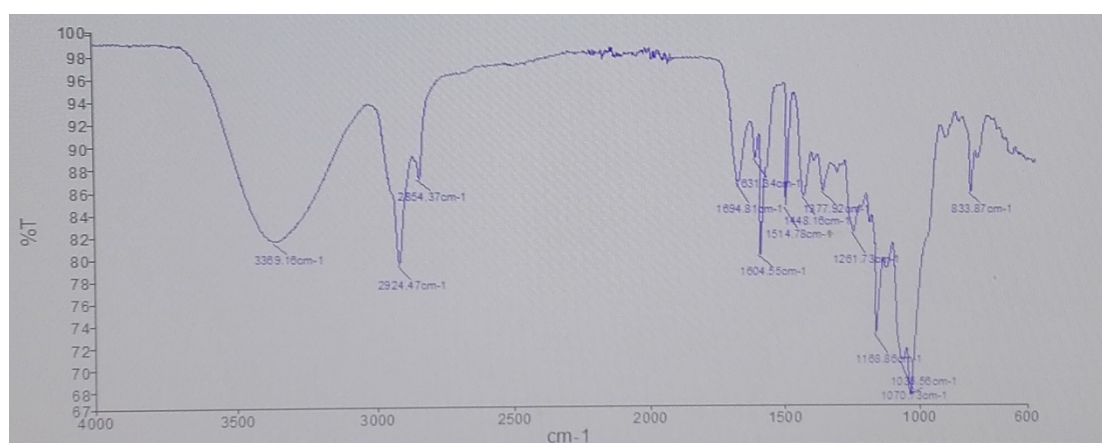

Figure S4-7 IR spectrum of mixture 4 (film)



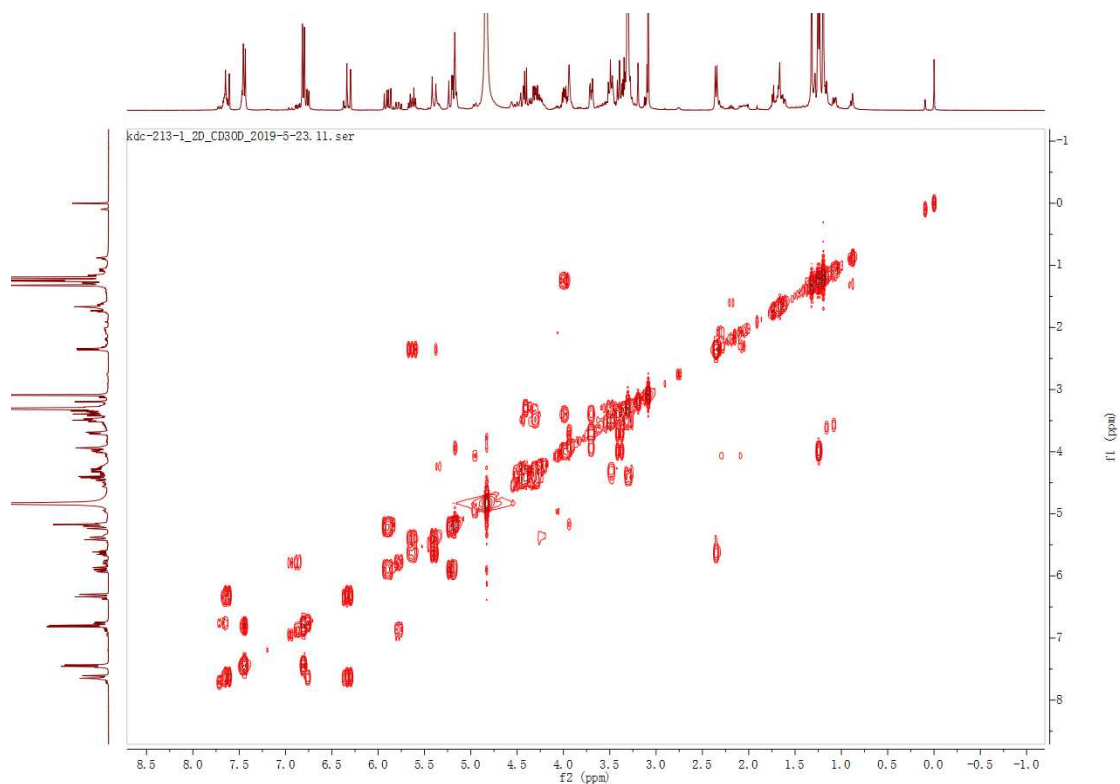

Figure S5-3  $^1\text{H}$ - $^1\text{H}$  COSY spectrum of compound **5** in  $\text{CD}_3\text{OD}$  (400 MHz)

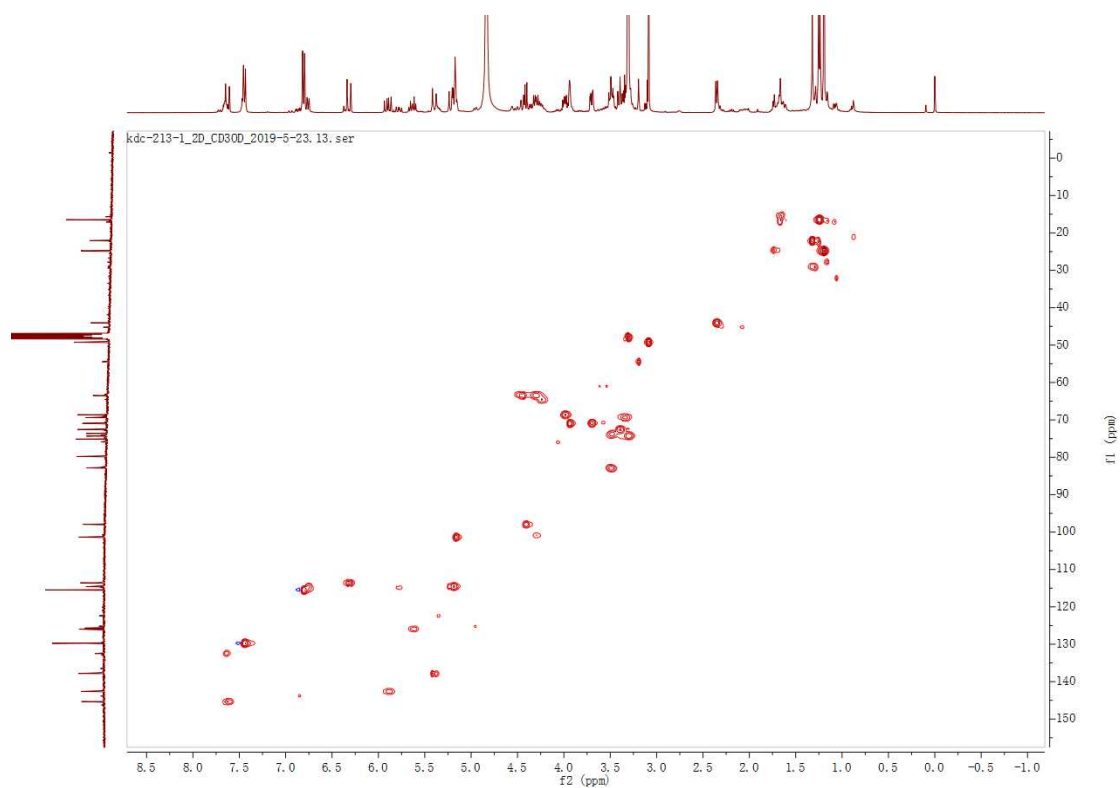

Figure S5-4 HSQC spectrum of compound **5** in  $\text{CD}_3\text{OD}$  (400 MHz)

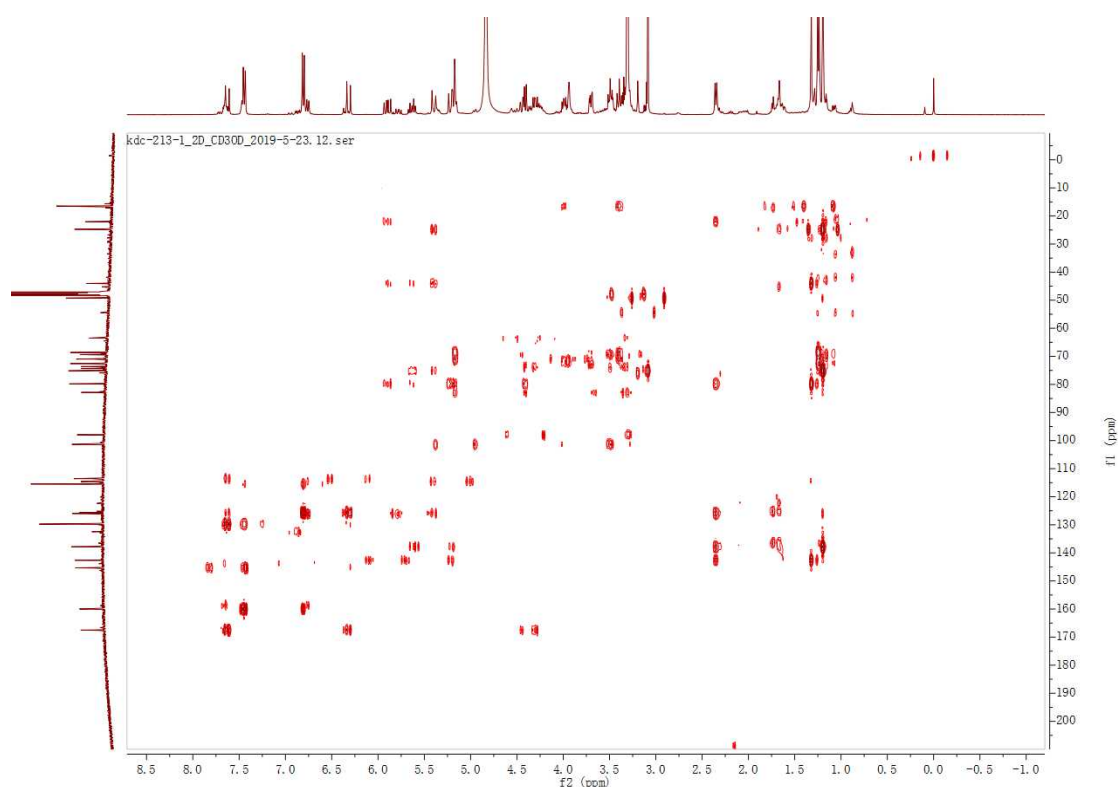

Figure S5-5 HMBC spectrum of compound **5** in CD<sub>3</sub>OD (400 MHz)

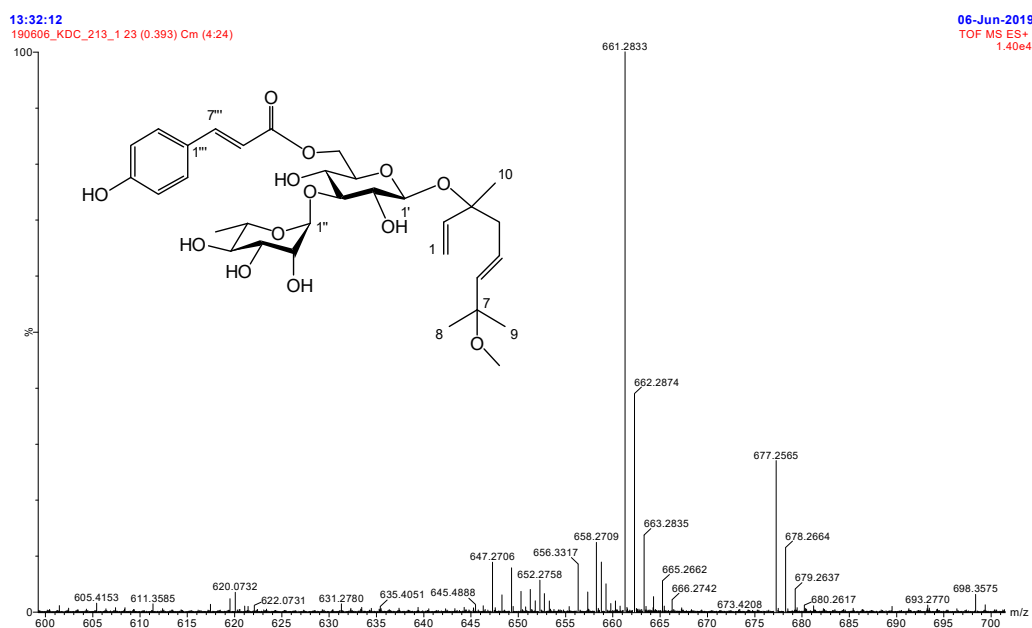

Figure S5-6 HRESIMS spectrum of compound **5**

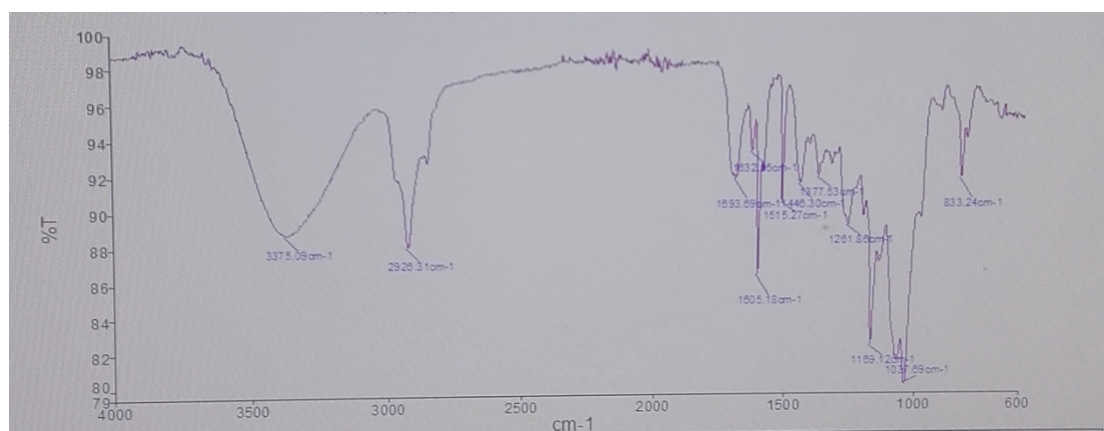

Figure S5-7 IR spectrum of compound **5** (film)

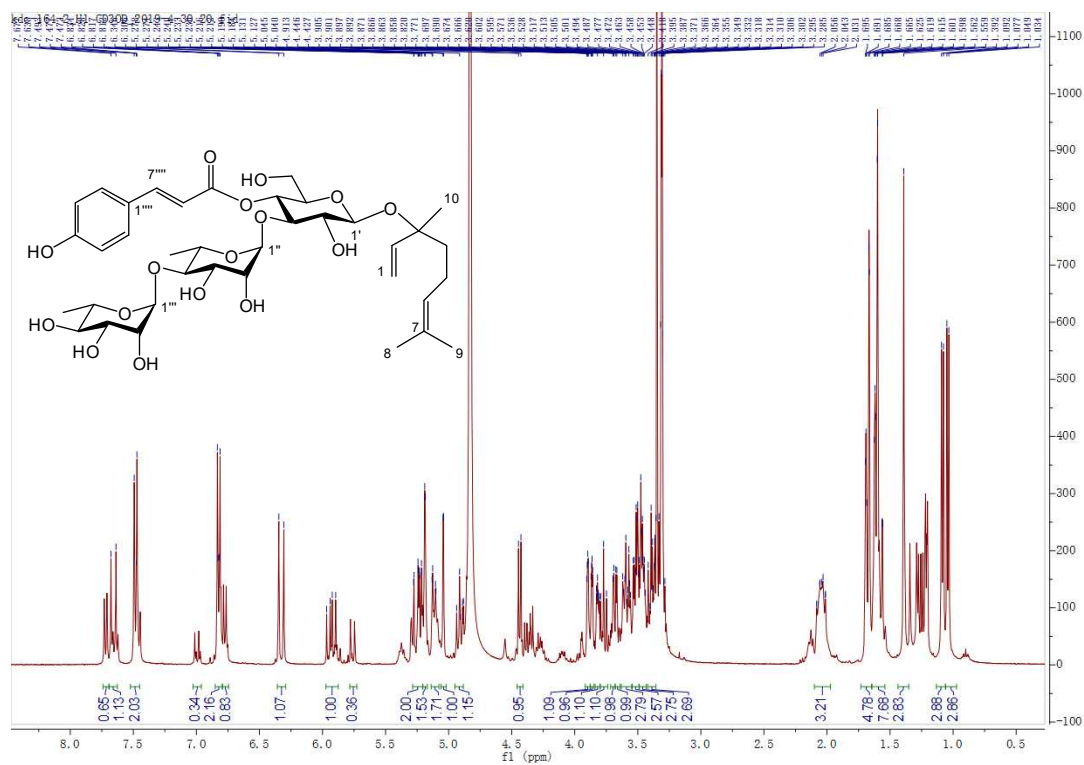

Figure S6-1 <sup>1</sup>H NMR spectrum of compound **6** in CD<sub>3</sub>OD (400 MHz)

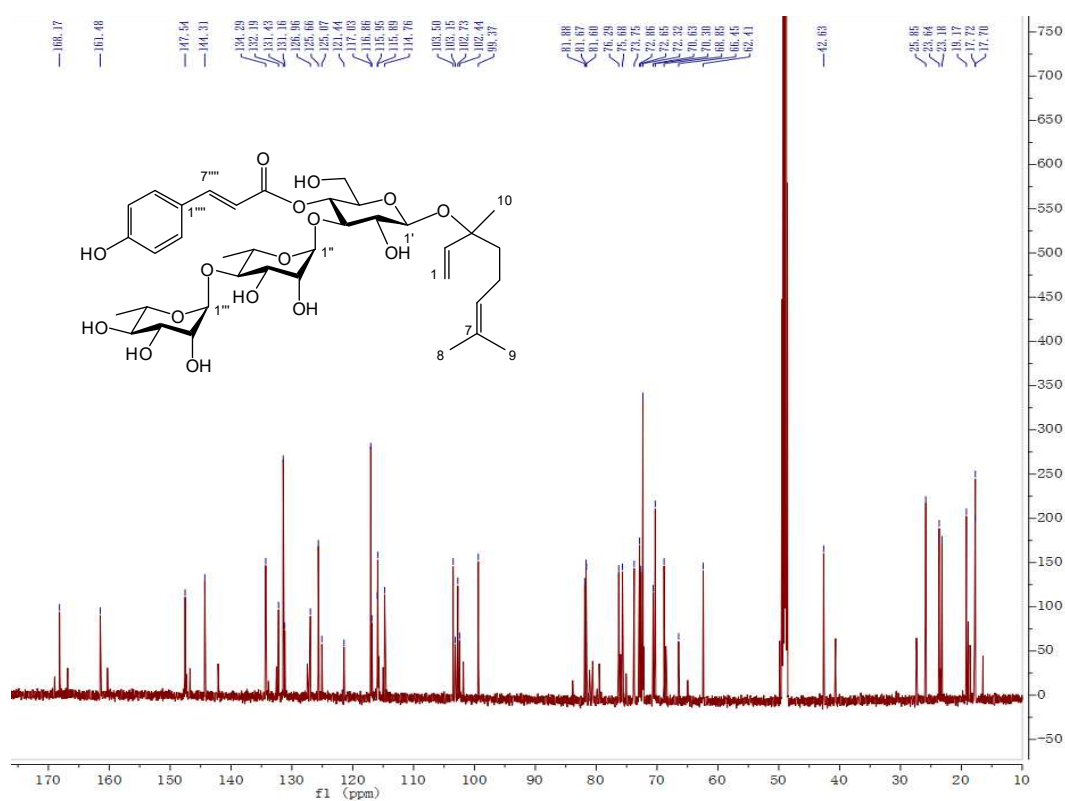

Figure S6-2 <sup>13</sup>C NMR spectrum of compound **6** in CD<sub>3</sub>OD (150 MHz)

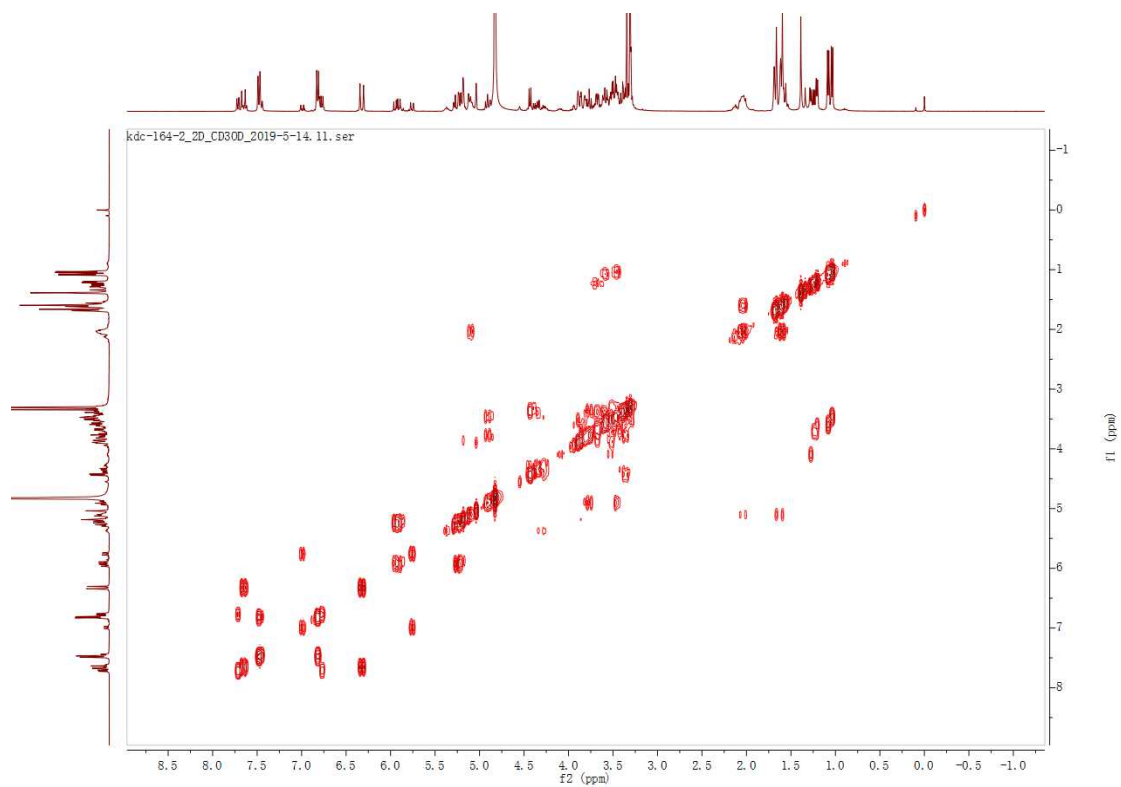

Figure S6-3 <sup>1</sup>H-<sup>1</sup>H COSY spectrum of compound **6** in CD<sub>3</sub>OD (400 MHz)

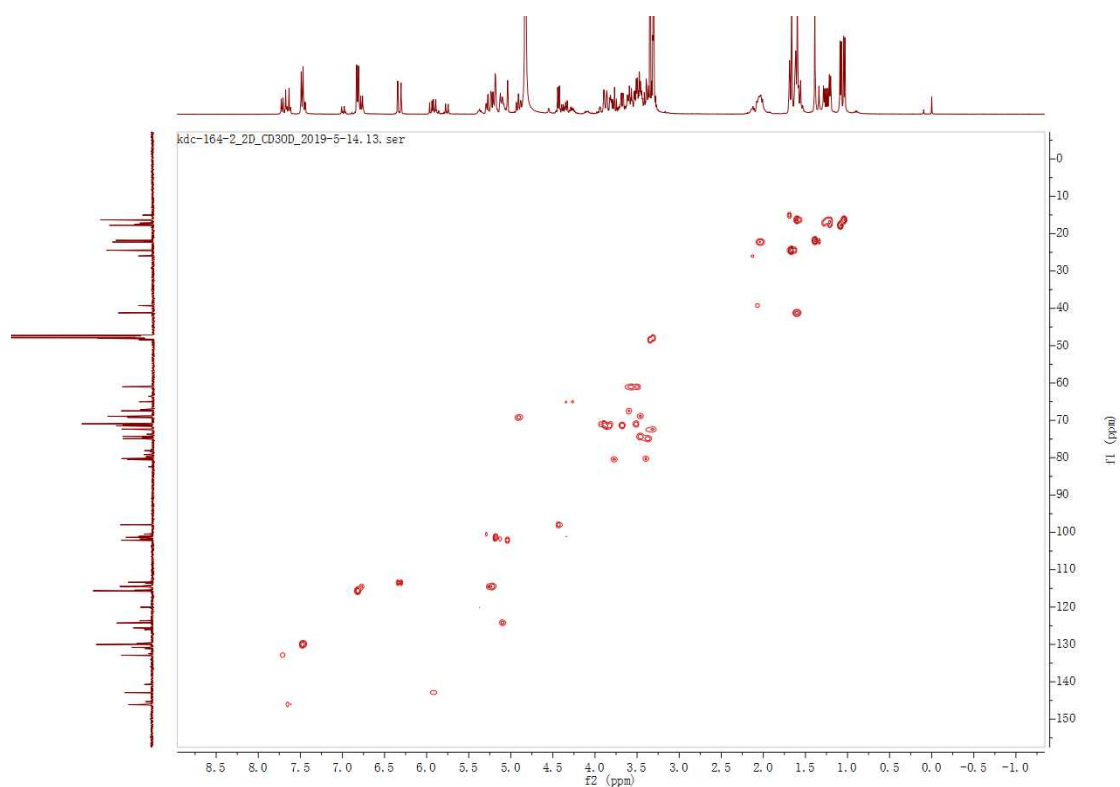

Figure S6-4 HSQC spectrum of compound **6** in CD<sub>3</sub>OD (400 MHz)

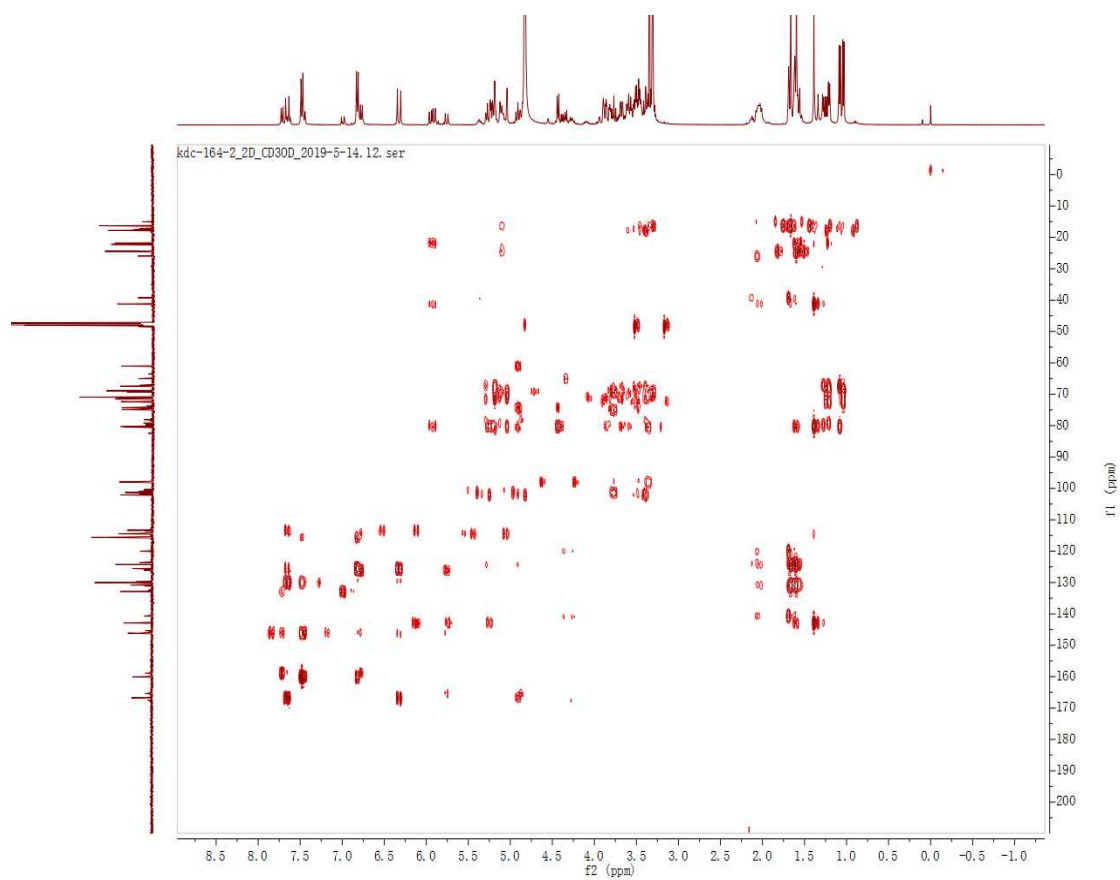

Figure S6-5 HMBC spectrum of compound **6** in CD<sub>3</sub>OD (400 MHz)

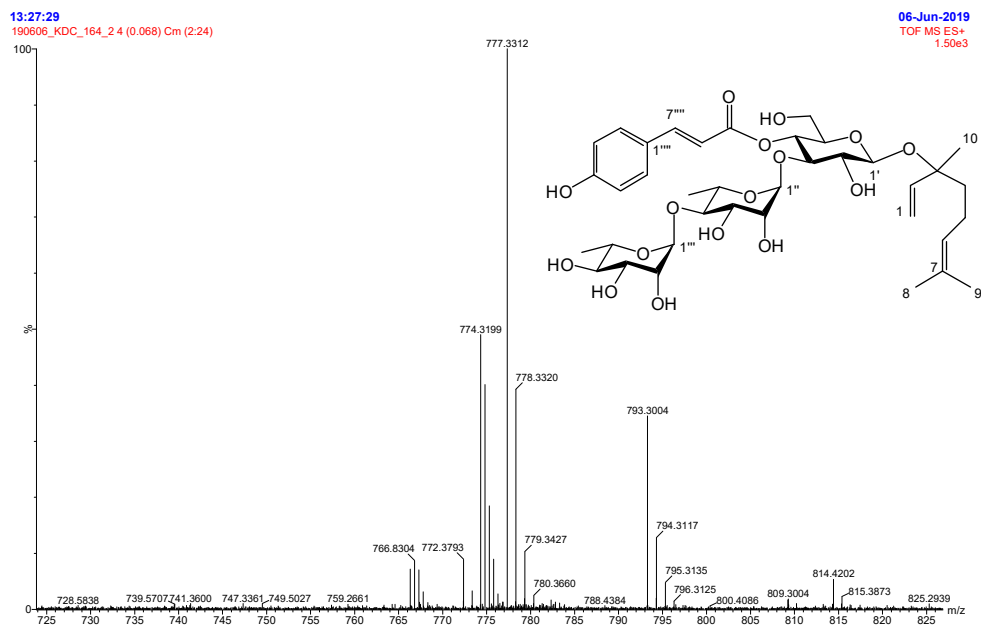

Figure S6-6 HRESIMS spectrum of compound **6**

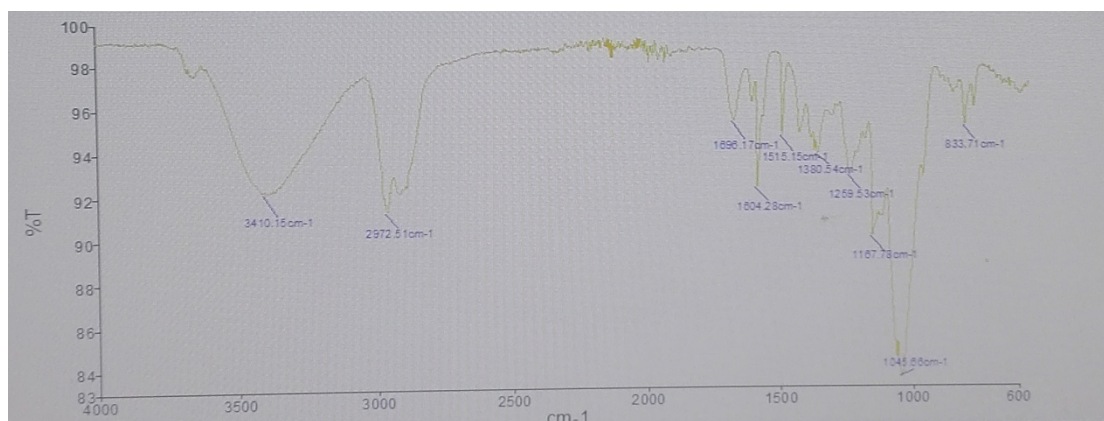

Figure S6-7 IR spectrum of compound **6** (film)

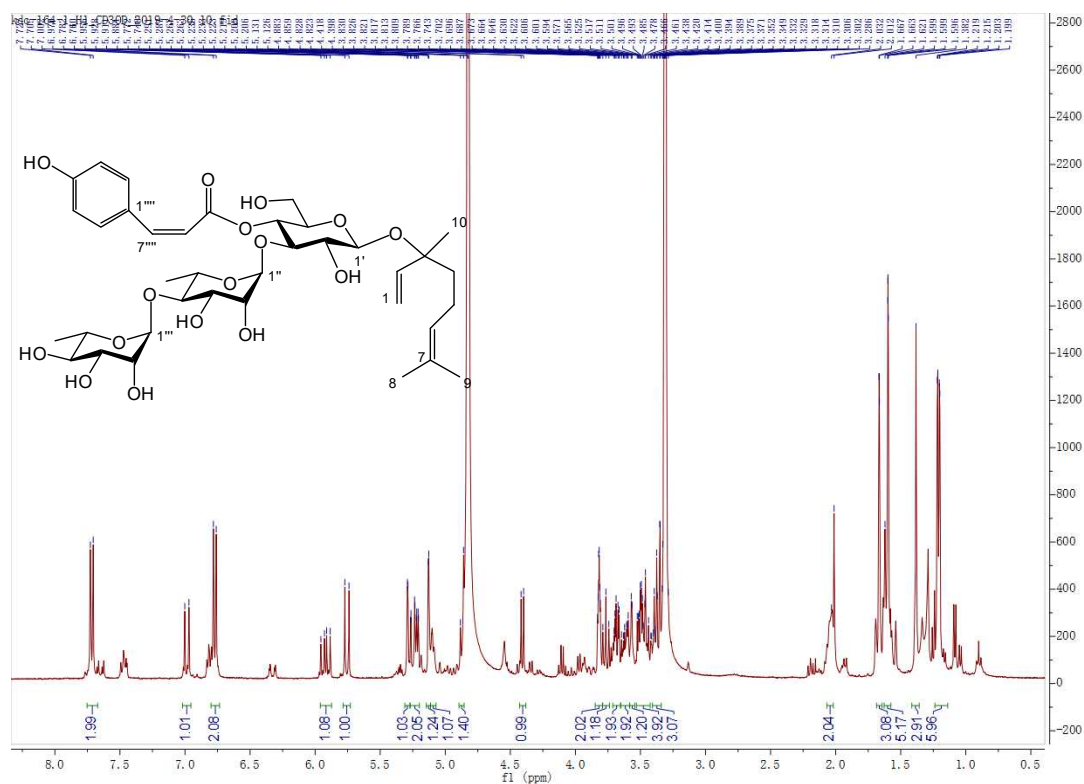

Figure S7-1 <sup>1</sup>H NMR spectrum of compound **7** in CD<sub>3</sub>OD (400 MHz)

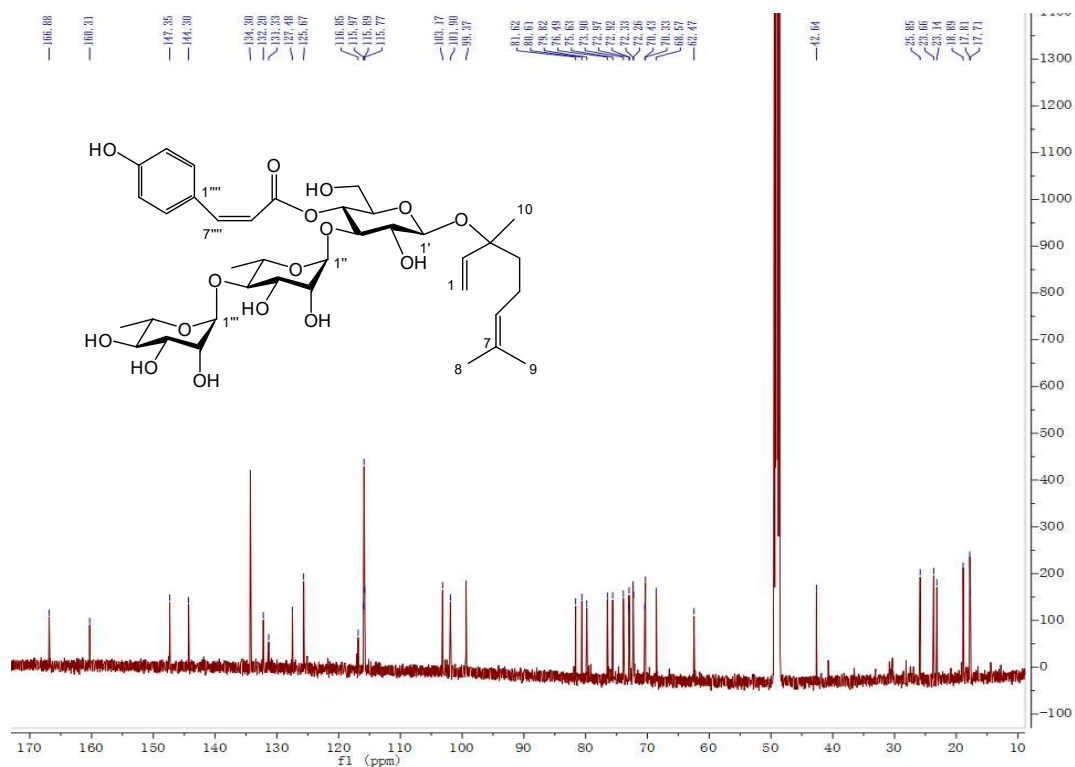

Figure S7-2 <sup>13</sup>C NMR spectrum of compound **7** in CD<sub>3</sub>OD (150 MHz)

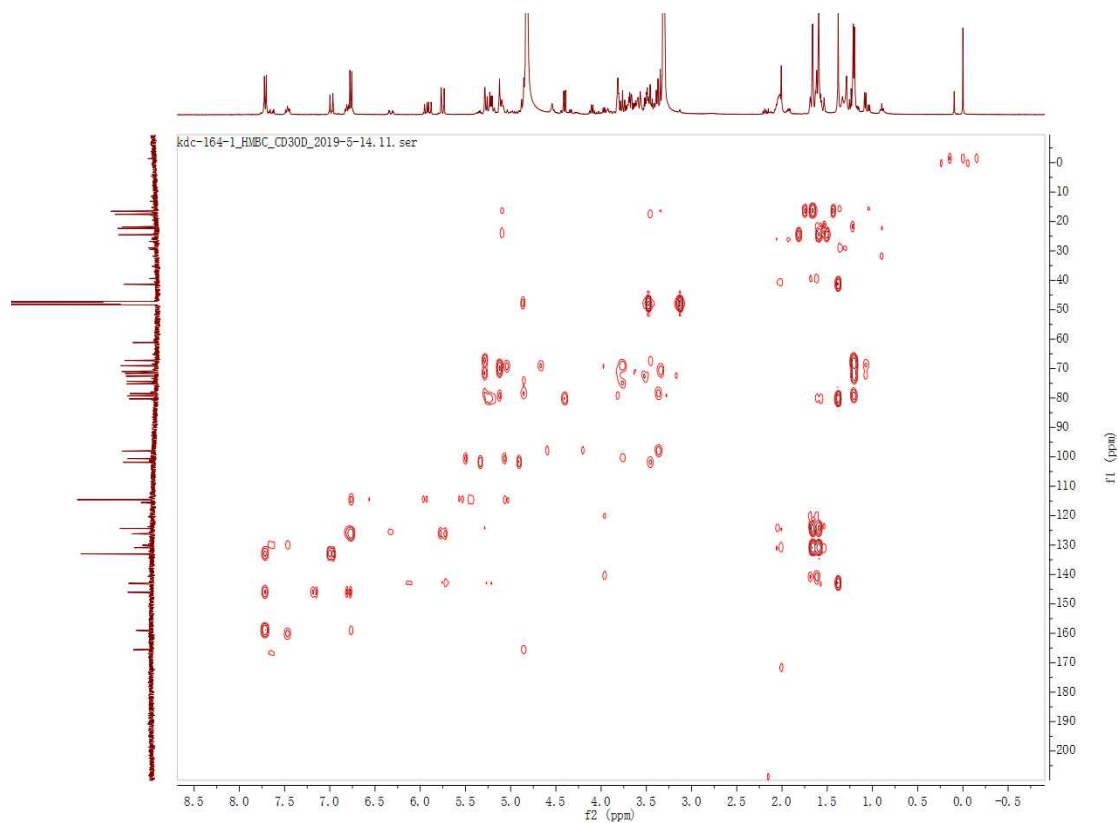

Figure S7-3 HMBC spectrum of compound **7** in CD<sub>3</sub>OD (400 MHz)

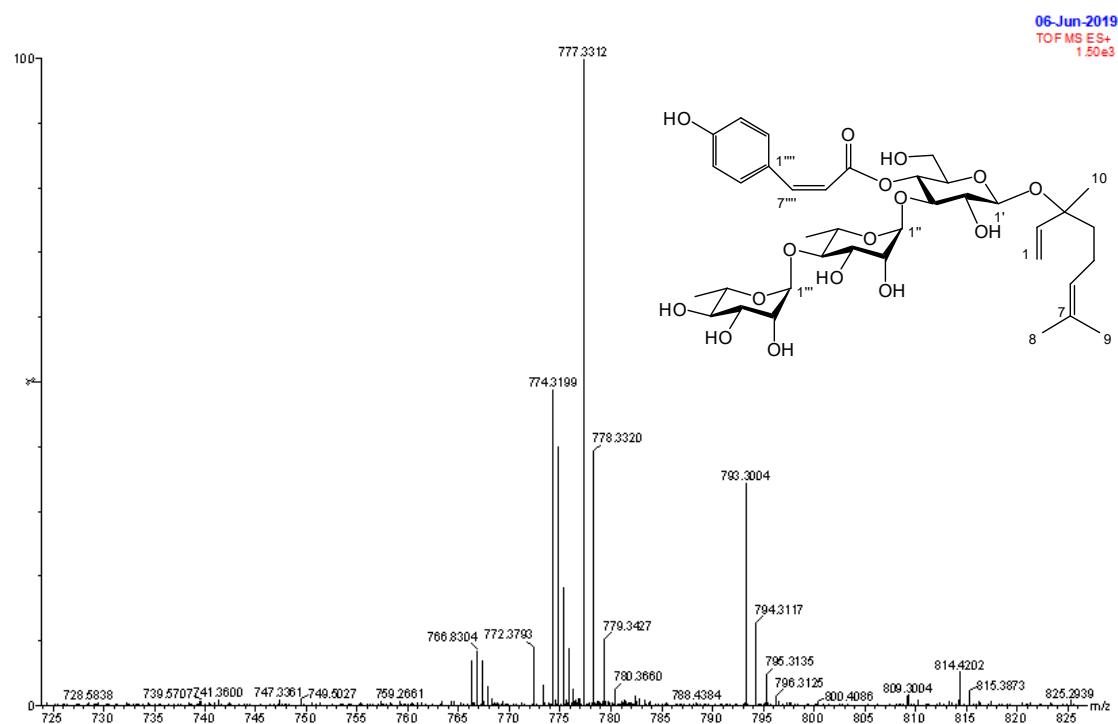

Figure S7-4 HRESIMS spectrum of compound **7**

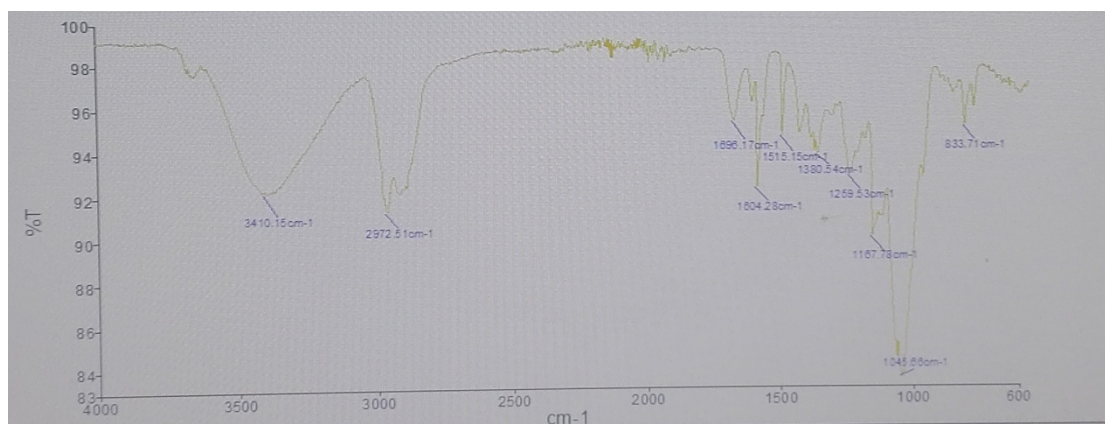

Figure S7-5 IR spectrum of compound **7** (film)

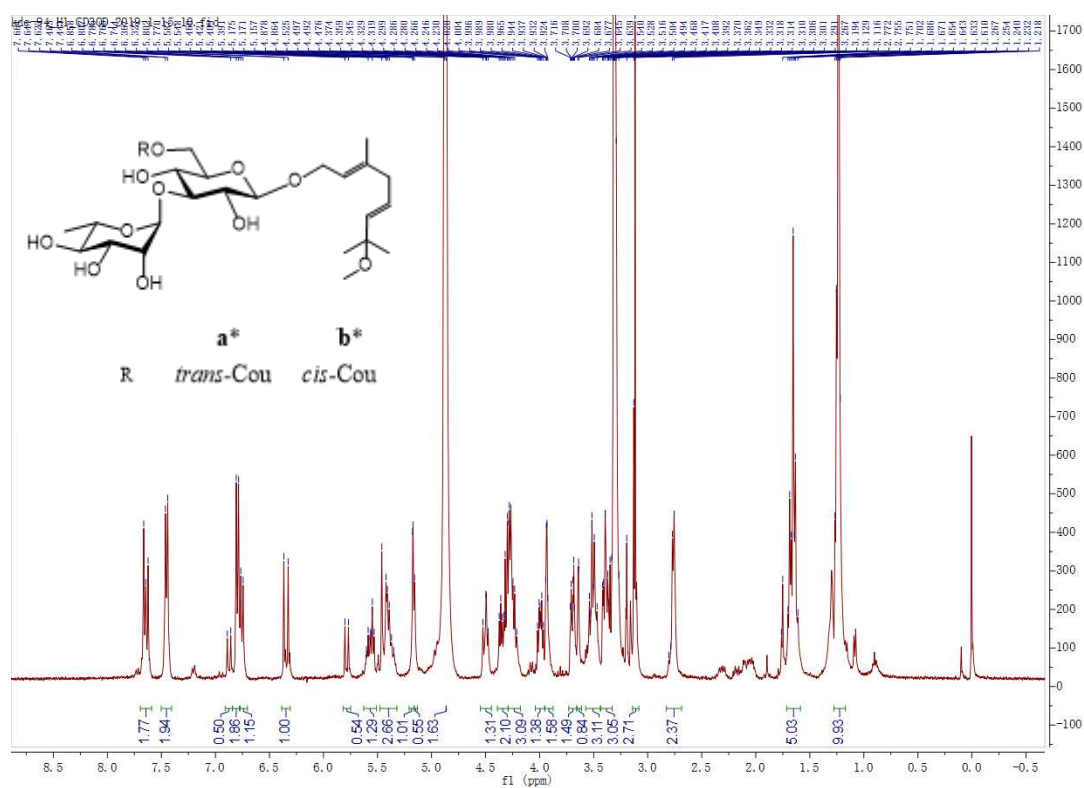

Figure S8-1  $^1\text{H}$  NMR spectrum of mixture **8** in  $\text{CD}_3\text{OD}$  (400 MHz)

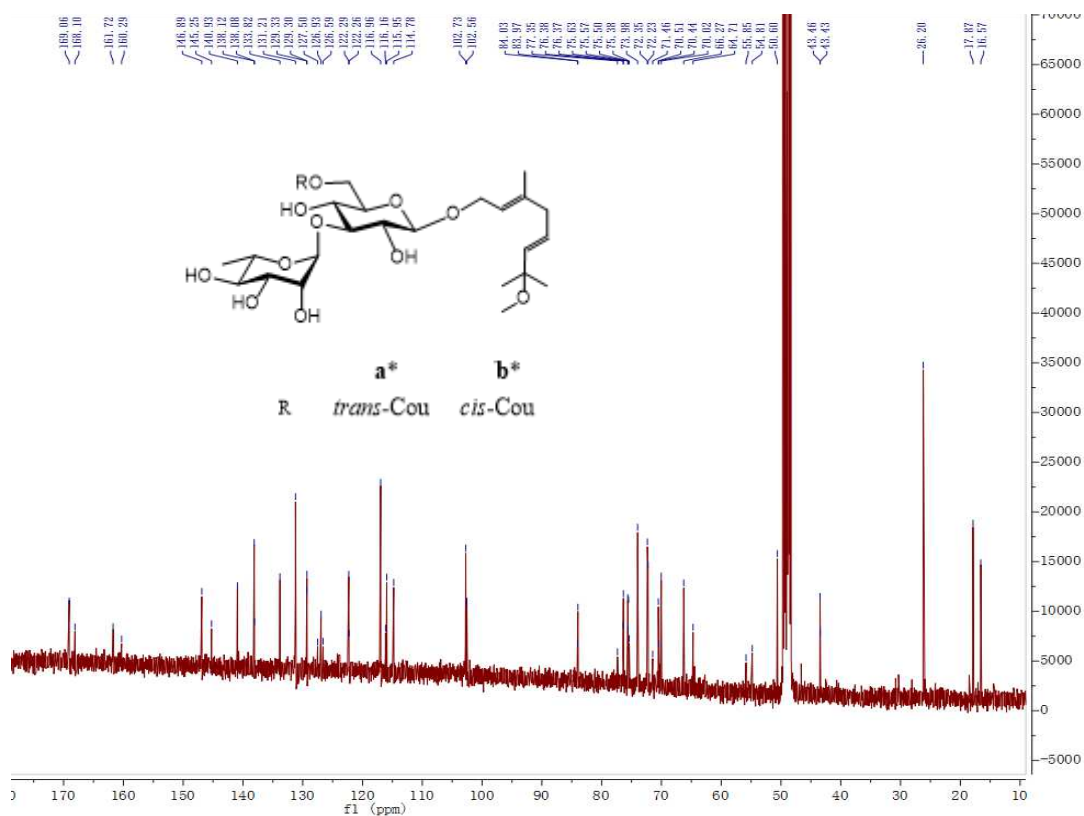

Figure S8-2  $^{13}\text{C}$  NMR spectrum of mixture **8** in  $\text{CD}_3\text{OD}$  (100 MHz)

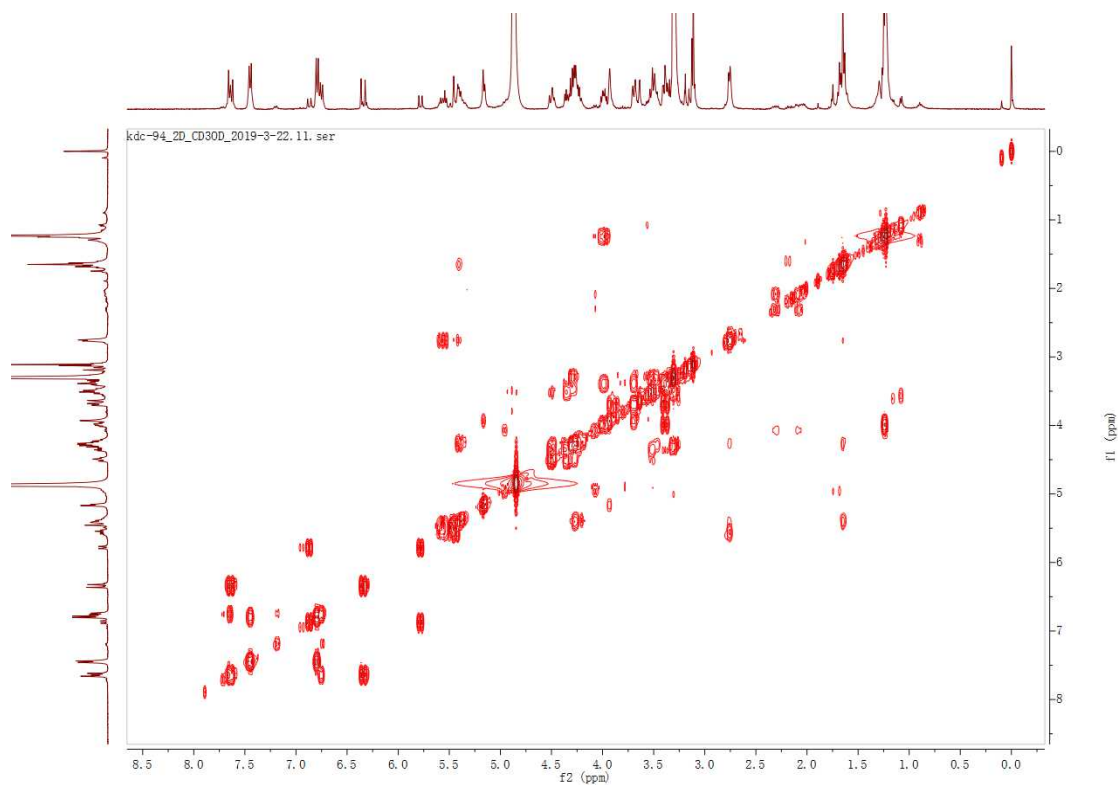

Figure S8-3  $^1\text{H}$ - $^1\text{H}$  COSY spectrum of mixture **8** in  $\text{CD}_3\text{OD}$  (400 MHz)

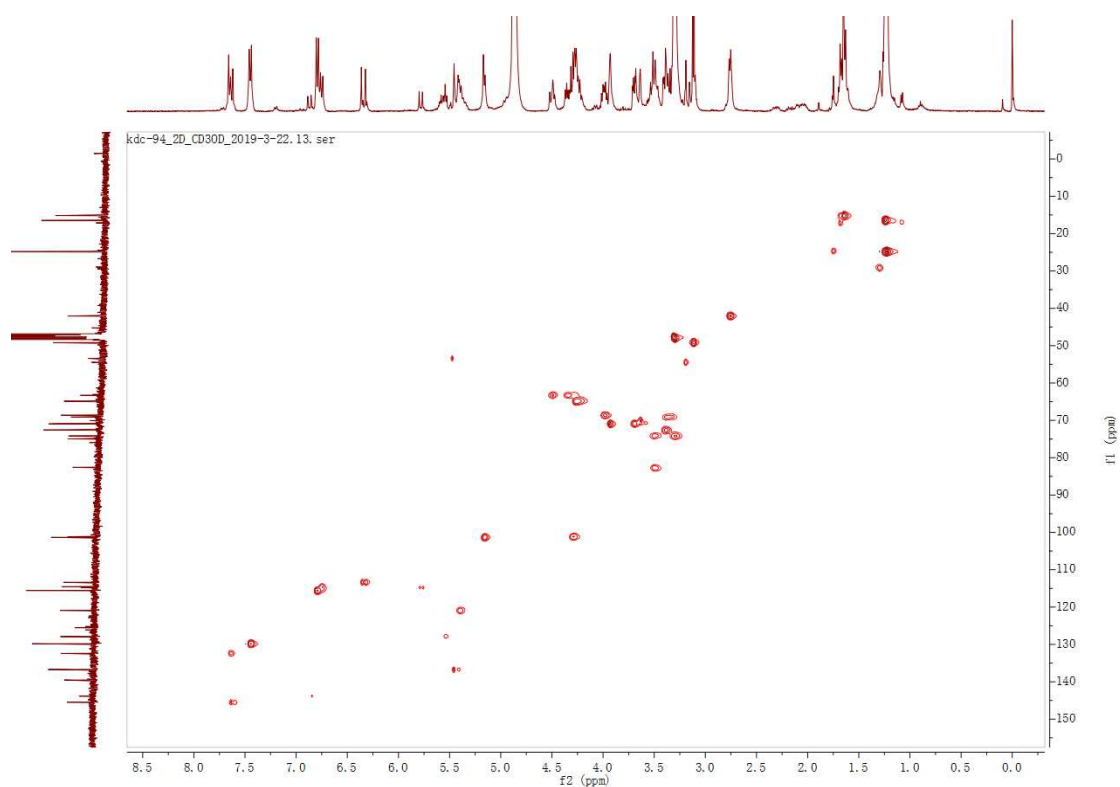

Figure S8-4 HSQC spectrum of mixture **8** in CD<sub>3</sub>OD (400 MHz)

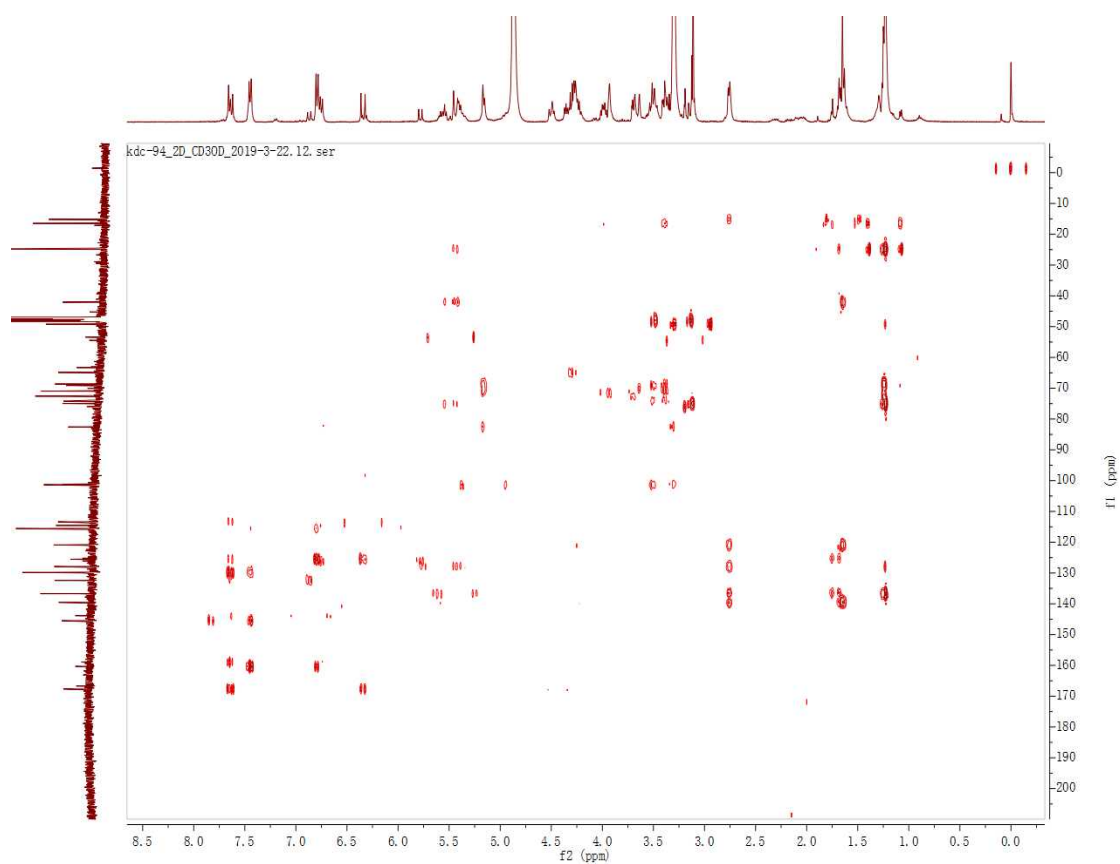

Figure S8-5 HMBC spectrum of mixture **8** in CD<sub>3</sub>OD (400 MHz)

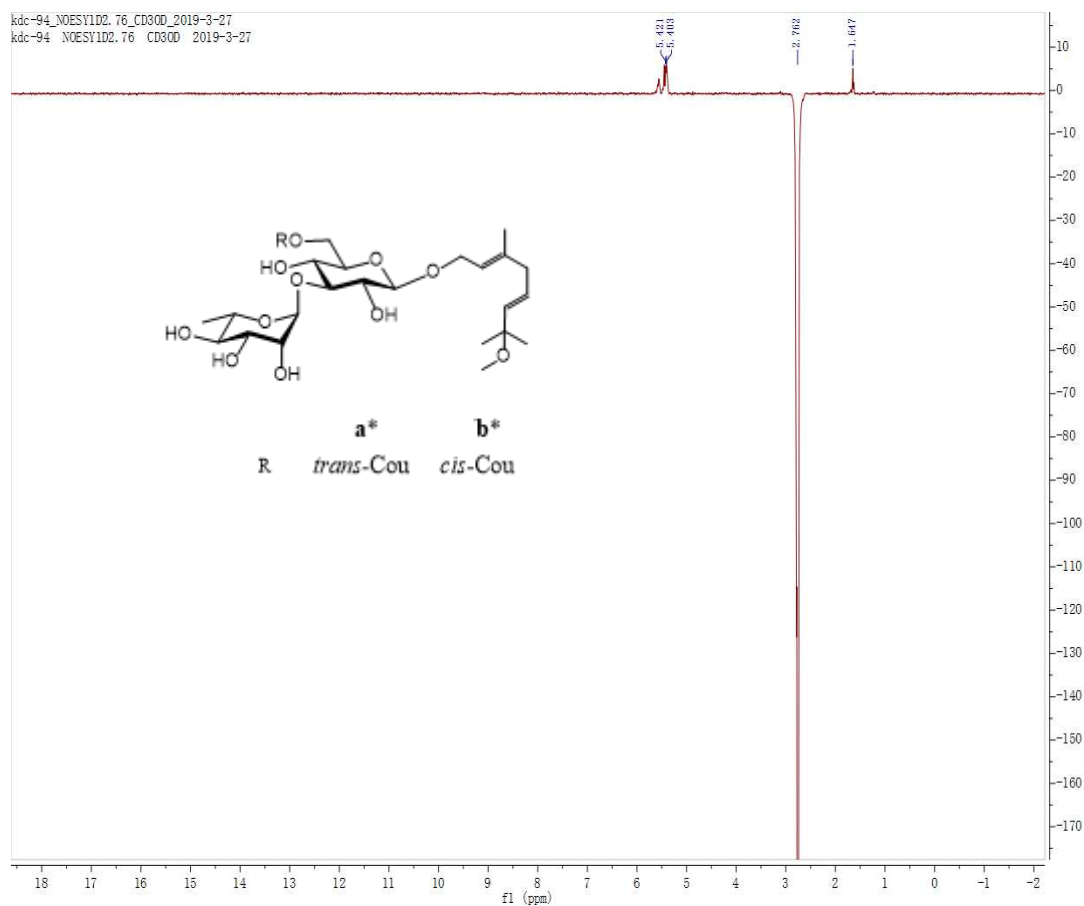

Figure S8-6 NOESY spectrum of mixture **8** in CD<sub>3</sub>OD (400 MHz)

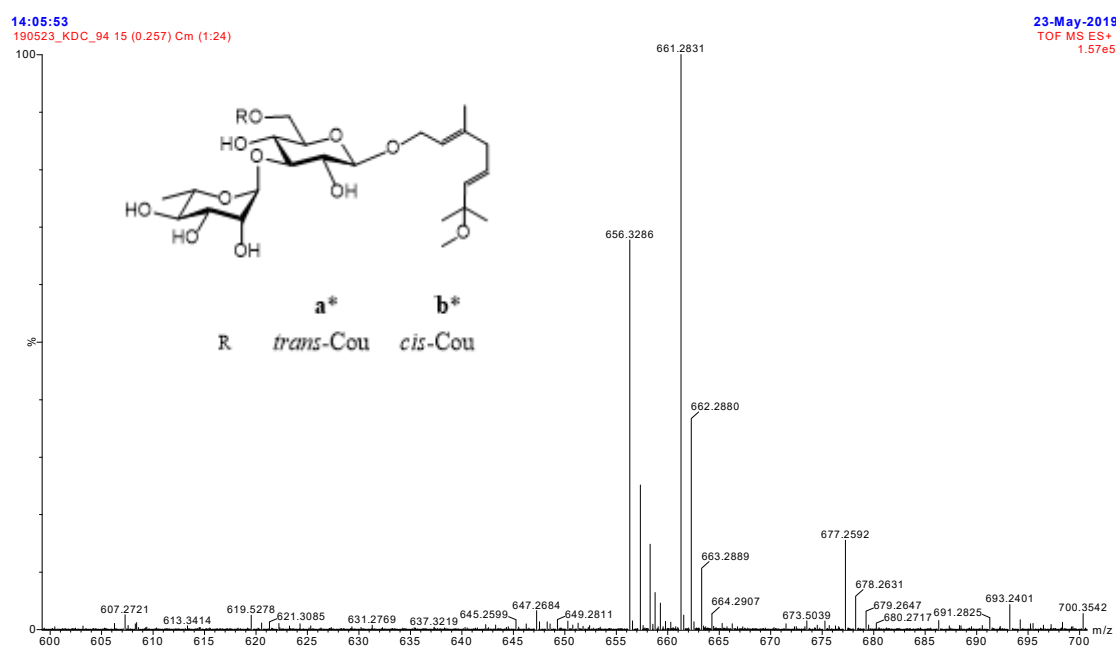

Figure S8-7 HRESIMS spectrum of mixture **8**

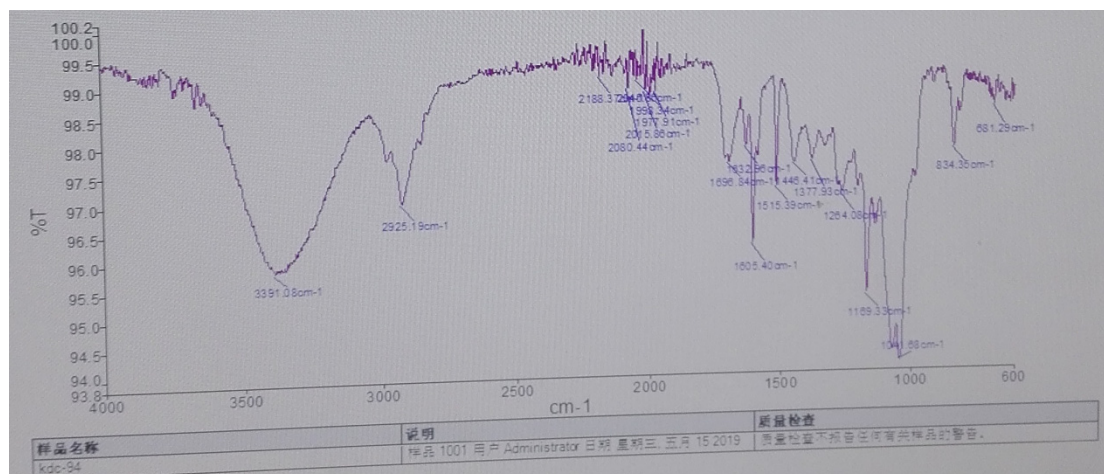

Figure S8-8 IR spectrum of mixture 8 (film)

Table S1 <sup>1</sup>H NMR (400 MHz) and <sup>13</sup>C NMR (150 MHz) data of **9a** and **9b** in CD<sub>3</sub>OD

| No   | ligurobustoside G ( <b>9a</b> )      |                     | ligurobustoside H ( <b>9b</b> )      |                     |
|------|--------------------------------------|---------------------|--------------------------------------|---------------------|
|      | $\delta_{\text{H}}$                  | $\delta_{\text{C}}$ | $\delta_{\text{H}}$                  | $\delta_{\text{C}}$ |
| 1    | 4.27 (1H, m)<br>4.36 (1H, m)         | 66.6                | 4.27 (1H, m)<br>4.36 (1H, m)         | 66.6                |
| 2    | 5.41 (1H, m)                         | 121.6               | 5.41 (1H, m)                         | 121.6               |
| 3    |                                      | 141.9               |                                      | 141.9               |
| 4    | 2.07 (2H, m)                         | 36.7                | 2.07 (2H, m)                         | 36.7                |
| 5    | 1.67 (2H, m)                         | 34.2                | 1.67 (2H, m)                         | 34.2                |
| 6    | 4.00 (1H, t, 6.8)                    | 76.1                | 4.00 (1H, t, 6.8)                    | 76.1                |
| 7    |                                      | 148.8               |                                      | 148.8               |
| 8    | 4.82 (1H, br. s)<br>4.93 (1H, br. s) | 111.5               | 4.82 (1H, br. s)<br>4.93 (1H, br. s) | 111.5               |
| 9    | 1.72 (3H, s)                         | 17.9                | 1.72 (3H, s)                         | 17.9                |
| 10   | 1.70 (3H, s)                         | 16.6                | 1.70 (3H, s)                         | 16.6                |
| Glc  |                                      |                     |                                      |                     |
| 1'   | 4.37 (1H, d, 8.0)                    | 102.7               | 4.32 (1H, d, 8.0)                    | 102.5               |
| 2'   | 3.39 (1H, m)                         | 76.2                | 3.37 (1H, m)                         | 76.2                |
| 3'   | 3.81 (1H, t, 9.2)                    | 81.6                | 3.75 (1H, t, 9.2)                    | 81.9                |
| 4'   | 4.91 (1H, m)                         | 70.7                | 4.86 (1H, m)                         | 70.5                |
| 5'   | 3.51 (1H, m)                         | 76.2                | 3.45 (1H, m)                         | 76.1                |
| 6'   | 3.53 (1H, m)<br>3.61 (1H, m)         | 62.4                | 3.53 (1H, m)<br>3.61 (1H, m)         | 62.4                |
| Rha  |                                      |                     |                                      |                     |
| 1''  | 5.19 (1H, d, 2.0)                    | 103.0               | 5.16 (1H, d, 2.0)                    | 103.2               |
| 2''  | 3.91 (1H, dd, 3.2, 2.0)              | 72.4                | 3.91 (1H, dd, 3.2, 2.0)              | 72.4                |
| 3''  | 3.58 (1H, m)                         | 72.1                | 3.58 (1H, m)                         | 72.1                |
| 4''  | 3.29 (1H, m)                         | 73.8                | 3.29 (1H, m)                         | 73.8                |
| 5''  | 3.58 (1H, m)                         | 70.4                | 3.60 (1H, m)                         | 70.4                |
| 6''  | 1.08 (3H, d, 6.0)                    | 18.4                | 1.16 (3H, d, 6.0)                    | 18.2                |
| Cou  |                                      |                     |                                      |                     |
| 1''' |                                      | 127.1               |                                      | 127.5               |
| 2''' | 7.47 (1H, d, 8.4)                    | 131.4               | 7.72 (1H, d, 8.4)                    | 134.3               |
| 3''' | 6.81 (1H, d, 8.4)                    | 116.9               | 6.76 (1H, d, 8.4)                    | 115.8               |
| 4''' |                                      | 161.5               |                                      | 160.4               |
| 5''' | 6.81 (1H, d, 8.4)                    | 116.9               | 6.76 (1H, d, 8.4)                    | 115.8               |
| 6''' | 7.47 (1H, d, 8.4)                    | 131.4               | 7.72 (1H, d, 8.4)                    | 134.3               |
| 7''' | 7.66 (1H, d, 16.0)                   | 147.6               | 6.95 (1H, d, 12.8)                   | 147.3               |
| 8''' | 6.34 (1H, d, 16.0)                   | 114.8               | 5.79 (1H, d, 12.8)                   | 115.9               |
| CO   |                                      | 168.3               |                                      | 166.9               |

Table S2 <sup>1</sup>H NMR (600 MHz) and <sup>13</sup>C NMR (100 MHz) data of **10** in CD<sub>3</sub>OD

| No   | ligurobustoside C ( <b>10</b> )                      |                     |
|------|------------------------------------------------------|---------------------|
|      | $\delta_{\text{H}}$                                  | $\delta_{\text{C}}$ |
| 1    | 4.28 (1H, dd, 11.4, 7.8)<br>4.36 (1H, dd, 11.4, 6.6) | 66.5                |
| 2    | 5.38 (1H, t, 6.6)                                    | 121.4               |
| 3    |                                                      | 142.1               |
| 4    | 2.06 (2H, t, 7.2)                                    | 40.7                |
| 5    | 2.13 (2H, t, 7.2)                                    | 27.4                |
| 6    | 5.12 (1H, t, 7.2)                                    | 125.1               |
| 7    |                                                      | 132.5               |
| 8    | 1.70 (3H, s)                                         | 26.0                |
| 9    | 1.62 (3H, s)                                         | 17.8                |
| 10   | 1.70 (3H, s)                                         | 16.5                |
| Glc  |                                                      |                     |
| 1'   | 4.37 (1H, d, 8.4)                                    | 102.5               |
| 2'   | 3.40 (1H, t, 8.4)                                    | 76.1                |
| 3'   | 3.81 (1H, t, 9.6)                                    | 81.6                |
| 4'   | 4.92 (1H, m)                                         | 70.6                |
| 5'   | 3.52 (1H, m)                                         | 76.1                |
| 6'   | 3.54 (1H, m)<br>3.63 (1H, m)                         | 62.4                |
| Rha  |                                                      |                     |
| 1''  | 5.19 (1H, br. s)                                     | 103.0               |
| 2''  | 3.91 (1H, m')                                        | 72.3                |
| 3''  | 3.57 (1H, m)                                         | 72.0                |
| 4''  | 3.29 (1H, t, 9.6)                                    | 73.8                |
| 5''  | 3.59 (1H, m)                                         | 70.4                |
| 6''  | 1.09 (3H, d, 6.0)                                    | 18.4                |
| Cou  |                                                      |                     |
| 1''' |                                                      | 127.1               |
| 2''' | 7.47 (1H, d, 8.4)                                    | 131.4               |
| 3''' | 6.81 (1H, d, 8.4')                                   | 116.9               |
| 4''' |                                                      | 161.5               |
| 5''' | 6.81 (1H, d, 8.4)                                    | 116.9               |
| 6''' | 7.47 (1H, d, 8.4)                                    | 131.4               |
| 7''' | 7.66 (1H, d, 16.2)                                   | 147.6               |
| 8''' | 6.35 (1H, d, 16.2)                                   | 114.8               |
| CO   |                                                      | 168.3               |

Table S3 <sup>1</sup>H NMR (400 MHz) and <sup>13</sup>C NMR (150 MHz) data of **11a** and **11b** in CD<sub>3</sub>OD

| No   | ligurobustoside K ( <b>11a</b> )                     |                     | ligurobustoside L ( <b>11b</b> )                     |                     |
|------|------------------------------------------------------|---------------------|------------------------------------------------------|---------------------|
|      | $\delta_{\text{H}}$                                  | $\delta_{\text{C}}$ | $\delta_{\text{H}}$                                  | $\delta_{\text{C}}$ |
| 1    | 4.29 (1H, dd, 12.0, 7.2)<br>4.37 (1H, dd, 12.0, 6.0) | 66.5                | 4.29 (1H, dd, 12.0, 7.2)<br>4.37 (1H, dd, 12.0, 6.0) | 66.5                |
| 2    | 5.44 (1H, t, 7.2)                                    | 121.6               | 5.44 (1H, t, 7.2)                                    | 121.6               |
| 3    |                                                      | 142.3               |                                                      | 142.3               |
| 4    | 2.11 (1H, m)<br>2.31 (1H, m)                         | 37.7                | 2.11 (1H, m)<br>2.31 (1H, m)                         | 37.7                |
| 5    | 1.37 (1H, m)<br>1.80 (1H, m)                         | 30.4                | 1.37 (1H, m)<br>1.80 (1H, m)                         | 30.4                |
| 6    | 3.27 (1H, m)                                         | 78.9                | 3.27 (1H, m)                                         | 78.9                |
| 7    |                                                      | 73.8                |                                                      | 73.8                |
| 8    | 1.15 (3H, s)                                         | 24.8                | 1.15 (3H, s)                                         | 24.8                |
| 9    | 1.18 (3H, s)                                         | 25.9                | 1.18 (3H, s)                                         | 25.9                |
| 10   | 1.72 (3H, s)                                         | 16.6                | 1.72 (3H, s)                                         | 16.6                |
| Glc  |                                                      |                     |                                                      |                     |
| 1'   | 4.38 (1H, d, 8.0)                                    | 102.6               | 4.32 (1H, d, 8.0)                                    | 102.6               |
| 2'   | 3.40 (1H, m)                                         | 76.1                | 3.40 (1H, m)                                         | 76.1                |
| 3'   | 3.82 (1H, t, 9.2)                                    | 81.6                | 3.76 (1H, t, 9.2)                                    | 81.9                |
| 4'   | 4.92 (1H, t, 9.2)                                    | 70.7                | 4.86 (1H, t, 9.2)                                    | 70.5                |
| 5'   | 3.53 (1H, m)                                         | 76.2                | 3.53 (1H, m)                                         | 76.2                |
| 6'   | 3.55 (1H, m)<br>3.63 (1H, m)                         | 62.4                | 3.55 (1H, m)<br>3.63 (1H, m)                         | 62.4                |
| Rha  |                                                      |                     |                                                      |                     |
| 1''  | 5.19 (1H, d, 2.0)                                    | 102.9               | 5.17 (1H, d, 2.0)                                    | 102.9               |
| 2''  | 3.91 (1H, 3.2, 2.0)                                  | 72.3                | 3.91 (1H, 3.2, 2.0)                                  | 72.3                |
| 3''  | 3.58 (1H, m)                                         | 72.0                | 3.58 (1H, m)                                         | 72.0                |
| 4''  | 3.29 (1H, m)                                         | 73.8                | 3.29 (1H, m)                                         | 73.8                |
| 5''  | 3.57 (1H, m)                                         | 70.4                | 3.57 (1H, m)                                         | 70.0                |
| 6''  | 1.08 (3H, d, 6.0)                                    | 18.4                | 1.15 (3H, d, 6.0)                                    | 18.2                |
| Cou  |                                                      |                     |                                                      |                     |
| 1''' |                                                      | 127.1               |                                                      | 127.7               |
| 2''' | 7.47 (1H, d, 8.8)                                    | 131.4               | 7.72 (1H, d, 8.8)                                    | 134.0               |
| 3''' | 6.81 (1H, d, 8.8)                                    | 116.9               | 6.76 (1H, d, 8.8)                                    | 115.8               |
| 4''' |                                                      | 161.5               |                                                      | 160.3               |
| 5''' | 6.81 (1H, d, 8.8)                                    | 116.9               | 6.76 (1H, d, 8.8)                                    | 115.8               |
| 6''' | 7.47 (1H, d, 8.8)                                    | 131.4               | 7.72 (1H, d, 8.8)                                    | 134.0               |
| 7''' | 7.66 (1H, d, 16.0)                                   | 147.6               | 6.95 (1H, d, 12.8)                                   | 147.3               |
| 8''' | 6.34 (1H, d, 16.0)                                   | 114.8               | 5.78 (1H, d, 12.8)                                   | 115.9               |
| CO   |                                                      | 168.3               |                                                      | 166.9               |

## *S1. Determination of bioactivities.*

### *S1.1. Determination of FAS inhibitory activity.*

Compounds **1-11** (1.0-1.7 mg) were dissolved in DMSO (100  $\mu$ L) and then diluted with potassium phosphate buffer (0.1 M, pH 7.0). Sample solution (100  $\mu$ L, 20-2000  $\mu$ M, 37  $^{\circ}$ C) and FAS substrates (1.8 mL, 37  $^{\circ}$ C) were mixed in a cuvette, and then FAS solution (100  $\mu$ L, 37  $^{\circ}$ C, isolated from chicken liver and kept in ice-bath before use) was added. The absorbance of reaction mixture was monitored by a UV-vis spectrophotometer at 340 nm in 1 min. The inhibitory effect was calculated by the following equation: FAS inhibition (%) =  $(A_{\text{control}} - A_{\text{sample}})/A_{\text{control}} \times 100\%$ , where  $A_{\text{control}}$  represented the FAS activity in the control group (phosphate buffer instead of sample solution),  $A_{\text{sample}}$  represented the FAS activity in the sample groups. The FAS activity was calculated as  $(A_0 - A_1)/1$  min, in which  $A_0$  was the absorbance of the reaction mixture when the FAS was added, and  $A_1$  was the absorbance of the reaction mixture after reaction 1 min. Orlistat was used as the positive control.

FAS substrates: 0.1 M potassium phosphate buffer (pH 7.0), 1 mM ethylenediaminetetraacetic acid (EDTA), 1 mM dithiothreitol, 3  $\mu$ M acetyl-coenzyme A, 10  $\mu$ M methylmalonyl coenzyme A, 35  $\mu$ M NADPH.

### *S1.2. Determination of $\alpha$ -glucosidase inhibitory activity.*

Compounds **1-11** (1.0-1.7 mg) were dissolved in DMSO (100  $\mu$ L) and then diluted with phosphate buffer (0.1 M, pH 6.8). Sample solution (50  $\mu$ L, 0.078-78 nM) and 4-nitrophenyl  $\alpha$ -D-glucopyranoside (pNPG) solution (50  $\mu$ L, 5 mM) were mixed and incubated in a 96-well microplate at 37  $^{\circ}$ C for 5 min.  $\alpha$ -Glucosidase from yeast (50  $\mu$ L, 0.2 U/mL) was added and incubated at 37  $^{\circ}$ C for another 30 min. Finally, 50  $\mu$ L of  $\text{Na}_2\text{CO}_3$  (1M) was added to terminate the reaction. The absorbance of mixture was measured using a microplate reader at a wavelength 405 nm. The background absorbance (phosphate buffer instead of substrate pNPG) of all samples in no more than 20  $\mu$ M at 405 nm was little, therefore the inhibitory effect was calculated by the following equation:  $\alpha$ -glucosidase inhibition (%) =  $(A_{\text{control}} - A_{\text{sample}})/A_{\text{control}} \times 100\%$ , where  $A_{\text{control}}$  represented the absorbance of phosphate buffer control without test samples,  $A_{\text{sample}}$  represented the absorbance of test samples. Acarbose was used as the positive control.

### S1.3. Determination of $\alpha$ -amylase inhibitory activity.

Phosphate buffer (20 mM, pH 6.9, containing 6 mM NaCl) was used as the solvent in this assay. Sample solution (50  $\mu$ L, 50-1500  $\mu$ M) and starch solution (50  $\mu$ L, 1%, w/v) were mixed and incubated in a 96-well microplate at 37 °C for 10 min. Then,  $\alpha$ -amylase solution (50  $\mu$ L, 0.2 U/mL) was added and the mixture was incubated at 37 °C for an additional 10 min. The reaction was stopped by addition of 3, 5-dinitrosalicylic acid colour reagent (100  $\mu$ L, 27.6 mM) and the 96-well microplate was immediately heated in 95 °C water bath for 10 min. When the reaction solution cooled to room temperature, all samples were diluted by adding distilled water (50  $\mu$ L), and then their absorbance was measured using a microplate reader at 540 nm. All samples had little background absorbance (phosphate buffer instead of starch solution) at 540 nm, thus the inhibitory activity was calculated as  $(A_{\text{control}} - A_{\text{sample}})/A_{\text{control}} \times 100\%$ , in which  $A_{\text{sample}}$  was the absorbance of the sample and  $A_{\text{control}}$  was the absorbance of the phosphate buffer control without test samples. Acarbose was used as the positive control.

### S1.4. DPPH radical scavenging assay

The DPPH radical scavenging assay was used to evaluate the antioxidant activity of compounds **1-11**. In a 96-well microplate, 100  $\mu$ L of DPPH solution (200  $\mu$ M in ethanol) was added to 100  $\mu$ L sample in ethanol at graded concentrations ranging from 7 to 500  $\mu$ M. The mixture was incubated in the dark at room temperature for 30 min. The absorbance of the reaction mixture was measured at 517 nm using a microplate reader. The DPPH scavenging activity was calculated by the following formula: DPPH scavenging activity (%) =  $(A_{\text{control}} - A_{\text{sample}})/A_{\text{control}} \times 100\%$ , where  $A_{\text{control}}$  was the absorbance of ethanol control without samples,  $A_{\text{sample}}$  was the absorbance of sample. Ascorbic acid was used as the positive control in the experiment.

### S1.5. ABTS radical scavenging assay

The ABTS radical scavenging assay was used also to evaluate the antioxidant activity of compounds **1-11**. The ABTS free radical cation (ABTS<sup>•+</sup>) was manufactured by reacting ABTS stock solution (7 mM) with potassium persulphate

(2.45 mM) in the dark at room temperature for 12-16 h. The ABTS<sup>•+</sup> solution was diluted with ethanol to an absorbance of 0.7 at 734 nm. Sample solution (100 µL, 2-100 µM in ethanol) was mixed with 150 µL diluted ABTS<sup>•+</sup> solution. After reaction in the dark at room temperature for 20 min, the absorbance of the reaction mixture at 734 nm was recorded. The ABTS<sup>•+</sup> scavenging capability was calculated as  $(A_{\text{control}} - A_{\text{sample}})/A_{\text{control}} \times 100\%$ , in which  $A_{\text{control}}$  was the absorbance of ethanol control without samples,  $A_{\text{sample}}$  was the absorbance of sample. Ascorbic acid was used as the positive control.
